# Supplementary material for: 14-3-3ζ coordinates adipogenesis of visceral fat
Source: PubMed Central journal article supplement (PMC4532800; doi:10.1038/ncomms8671), 2015-07-29
Supplement: ncomms8671-s1.pdf [file ncomms8671-s1.pdf]

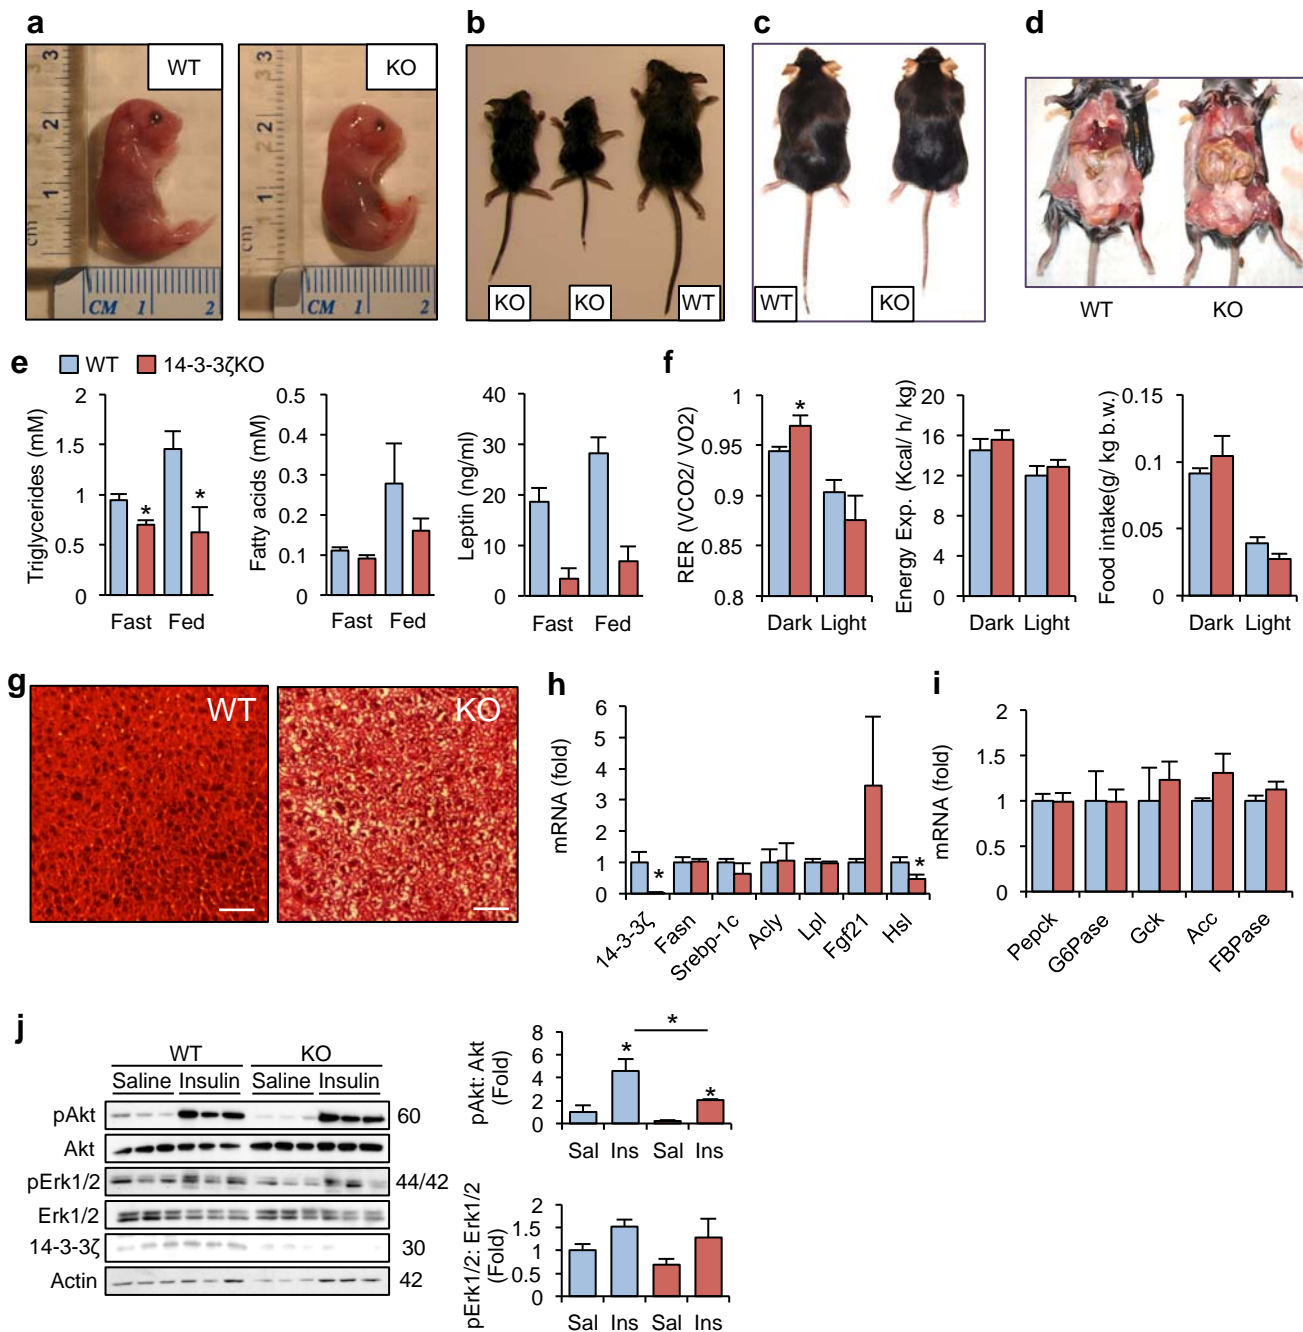

**Supplementary Figure 1. 14-3-3ζKO mice display mild perturbations in glucose homeostasis and insulin sensitivity.** (a-c) Images of 14-3-3ζKO embryos at e19.5 (a), mice at 3 weeks of age (b), and 24 weeks of age (c). (d) View of gonadal fat pads from WT and 14-3-3ζKO mice (representative of n=4 per genotype). (e) Fasting and random-fed plasma leptin, free fatty acid, and triglyceride levels from 32 week-old mice (n=5-7 per group). (f) Wild-type (WT) and 14-3-3ζKO mice were allowed to acclimate for 1 week prior to placement in metabolic cages to measure energy expenditure and food intake. Data were averaged from the last two full light: dark cycles (n=5-7). (g) Histological examination of livers showed marked steatosis in 14-3-3ζKO mice (representative of n = 6 mice per genotype). (h,i) Isolated RNA was subjected to quantitative PCR analysis of lipogenic (h) and gluconeogenic (i) genes between wildtype and 14-3-3ζKO mice (n=6 per genotype). (j) Akt phosphorylation, as measured by immunoblotting, 5 minutes after an *i.p.* bolus of insulin (5 U/kg) in liver samples from overnight-fasted WT and 14-3-3ζKO mice (n=6 per genotype). Significant differences, as assessed by Student's t-test or ANOVA, are indicated by \*: p<0.05. Error bars represent S.E.M.

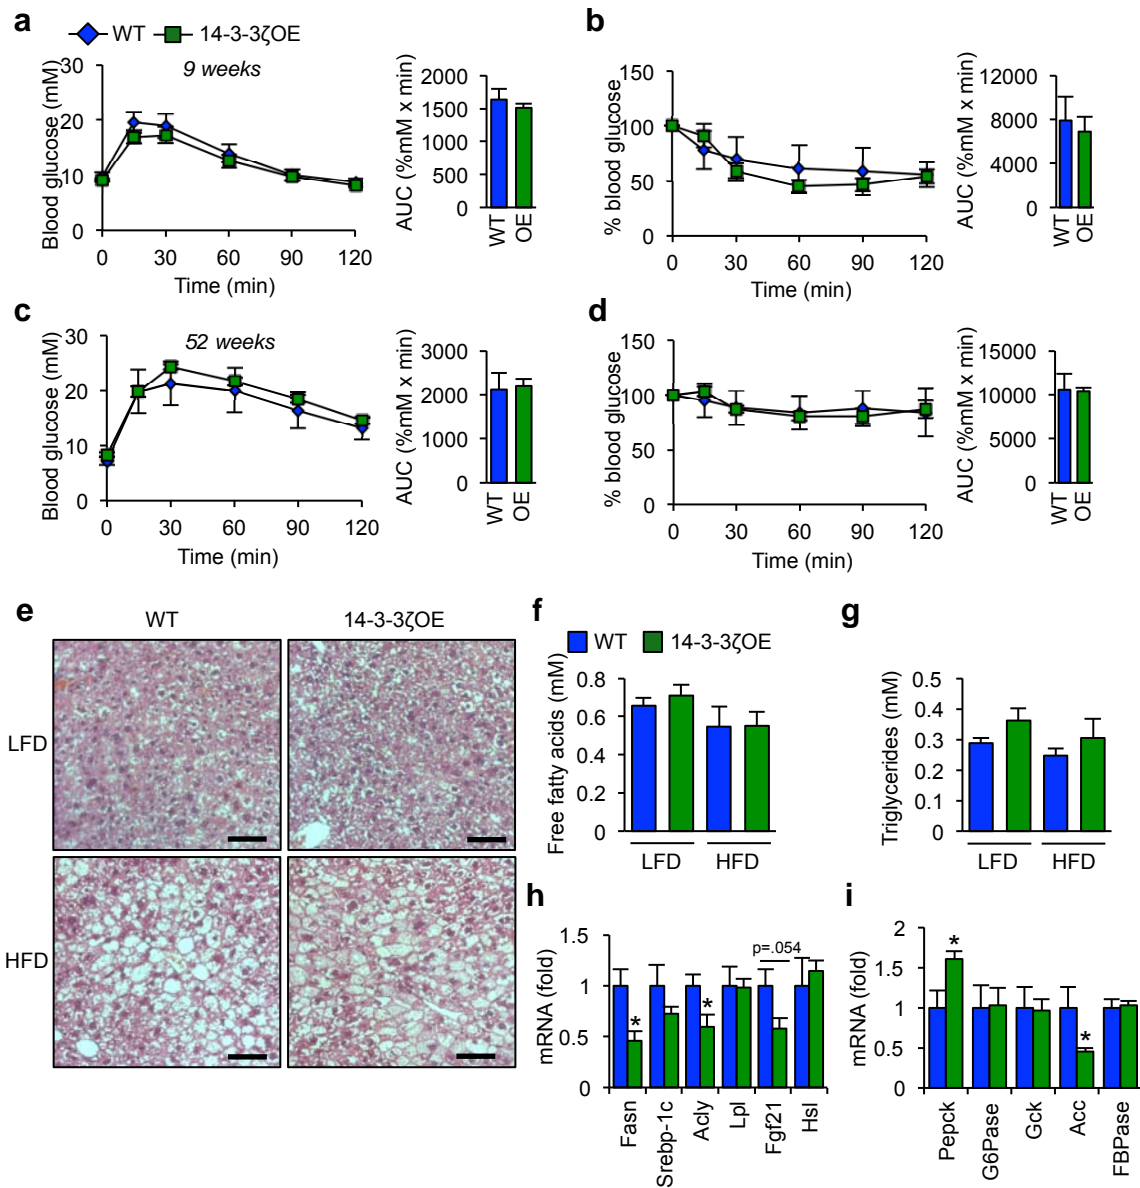

**Supplementary Figure 2. Modest over-expression of 14-3-3ζ has minor effects on the liver.** (a-d) Glucose tolerance (a,c) and insulin tolerance (b,d) tests were administered to WT and 14-3-3ζOE mice at 9 (a,b) and 52 (c,d) weeks of age (n=4-9 per group). (e) Liver histology of wild-type (WT) and 14-3-3ζ over-expressing (14-3-3ζOE) mice fed low-fat (LFD, 10%) or high-fat (HFD, 60%) diets for 8 weeks (representative images of n=4 mice per group, scale bars= 100 μm). (f,g) Circulating fasting plasma free fatty acids (f) and triglycerides (g) from WT and 14-3-3ζOE mice (n=4-9 per group). (h,i) Isolated liver RNA was subjected to quantitative PCR analysis for lipogenic (h) and gluconeogenic (i) genes between WT and 14-3-3ζOE mice (n=4-9 per group). Significant differences, as assessed by Student's t-test, are indicated by \*: p<0.05. Error bars represent S.E.M.

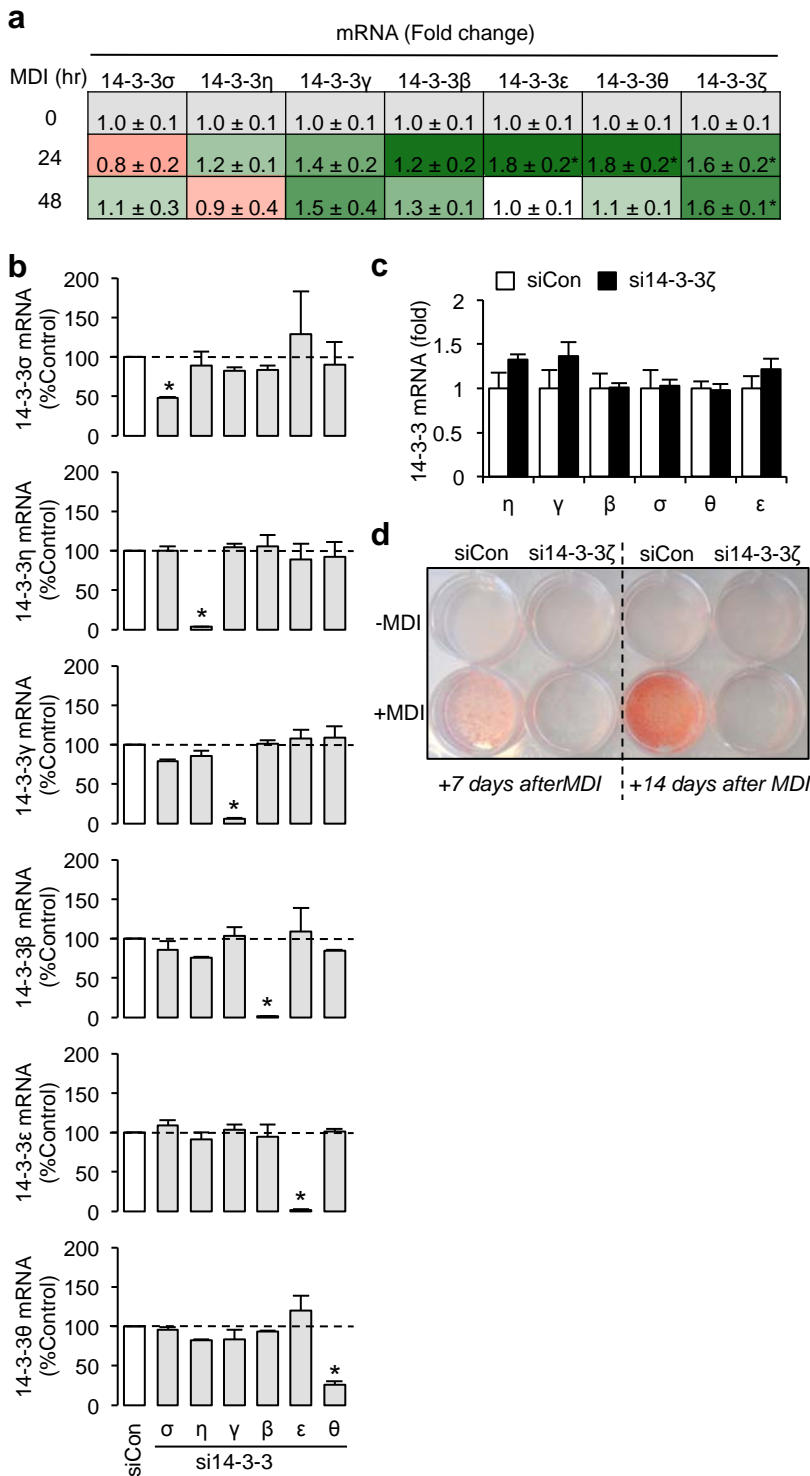

**Supplementary Figure 3. Knockdown of 14-3-3 $\zeta$  does not affect the expression of other isoforms in 3T3-L1 pre-**

**adipocytes. (a)** Expression profile of all 14-3-3 isoforms in 3T3-L1 pre-adipocytes during the first 48 hours of differentiation (n=4 independent experiments; \*: p<0.05 when compared to undifferentiated cells, as assessed by one-way ANOVA). **(b)** 3T3-L1 pre-adipocytes were transfected with siRNA to knock down each mammalian 14-3-3 isoform. 48 hours after transfection, RNA was isolated, cDNA synthesized, and quantitative PCR was performed. All data were normalized to HPRT and quantified by the  $2^{-\Delta\Delta C_t}$  method (n=3 biological replicates, \*: p<0.05 when compared to siCon, as assessed by Student's t-test). **(c)** Quantitative PCR analysis of remaining 14-3-3 isoforms from 14-3-3 $\zeta$ -depleted 3T3-L1 pre-adipocytes (n=3 independent experiments). **(d)** Following transfection with siRNA and induction of differentiation with MDI, 3T3-L1 cells were maintained in insulin-containing media for 7 or 14 days (representative of n=3 experiments). Error bars represent S.E.M.

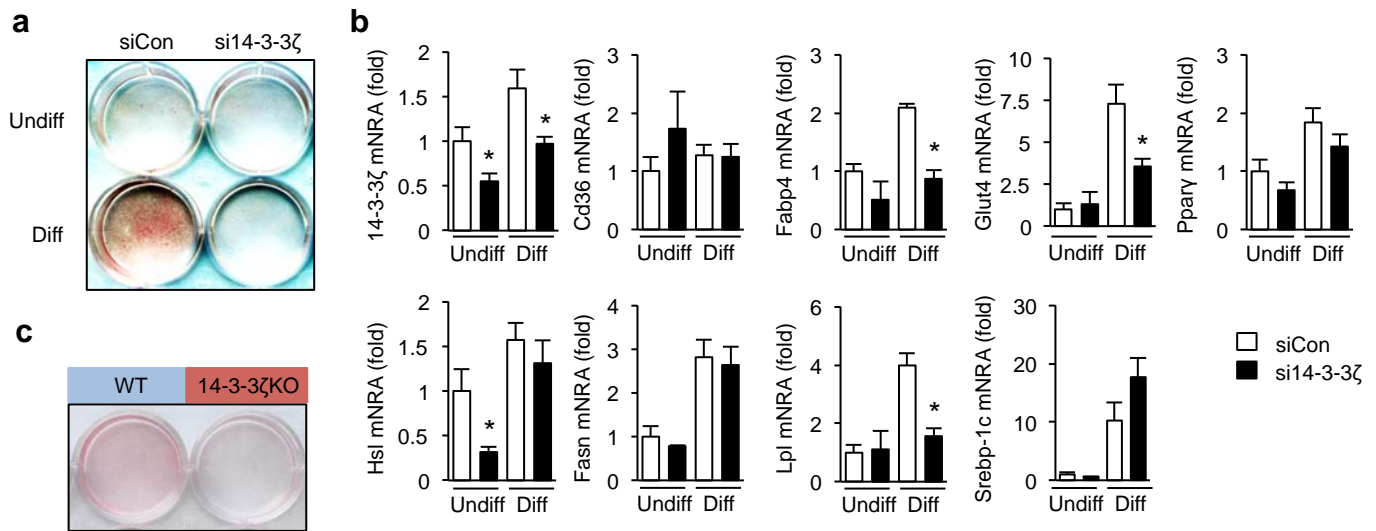

**Supplementary Figure 4. Role of 14-3-3ζ in adipogenesis can be reproduced in 3T3-F442A cells and mouse embryonic fibroblasts.**

**(a)** 3T3-F442A cells were transfected with siRNA against 14-3-3ζ or the scrambled control (siCon) 24 hours prior to differentiation. Seven days after differentiation, cells were stained with Oil Red O (representative of n=3 independent experiments). **(b)** Quantitative PCR for mature adipocyte markers was performed on isolated RNA from transfected 3T3-F442A cells seven days following differentiation (n=4 biological replicates). **(c)** Differentiation of mouse embryonic fibroblasts derived from WT and 14-3-3ζKO mice into adipocytes (representative of n=4 independent experiments). Significant differences between siCon vs. si14-3-3ζ, as assessed by Student's t-test, are indicated by \*: p<0.05. Error bars represent S.E.M.

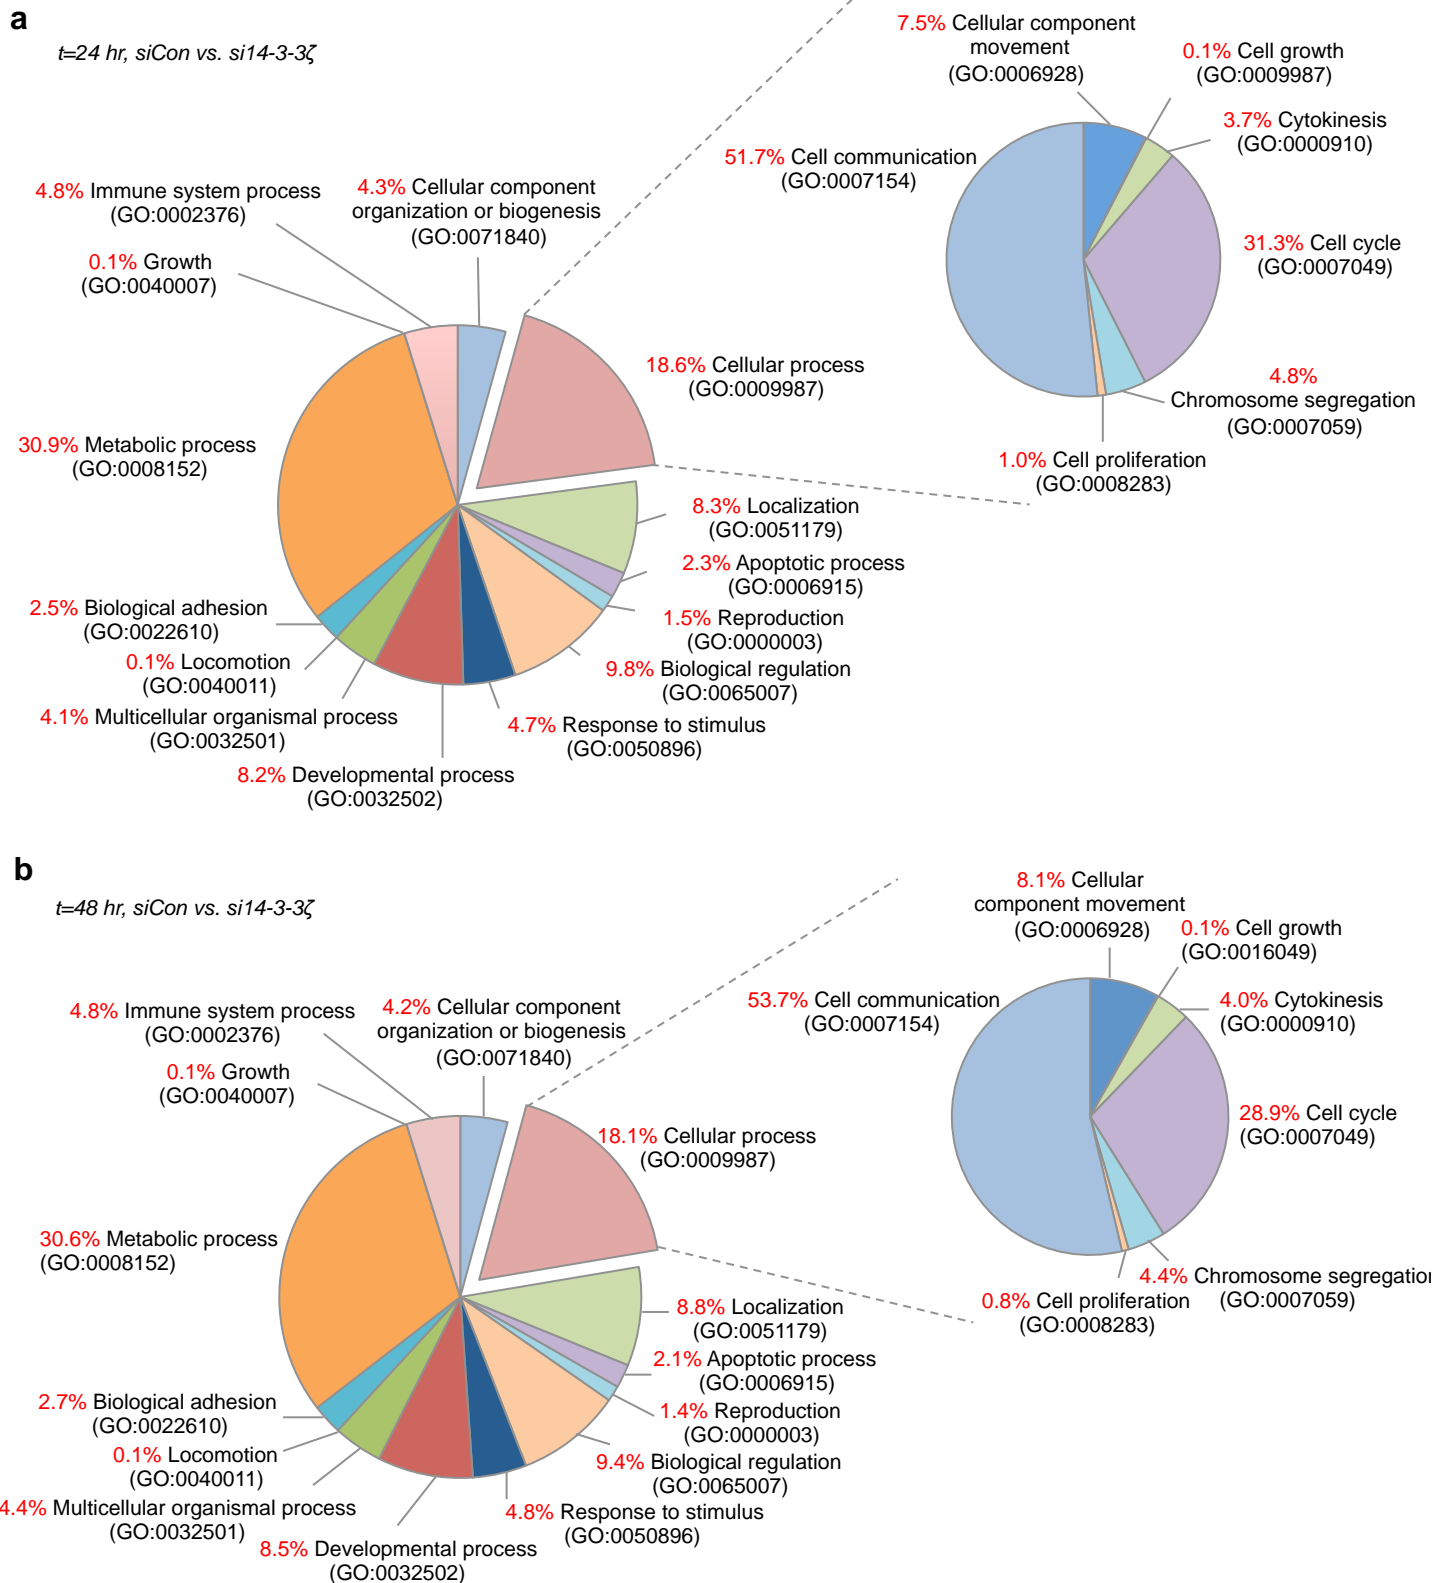

**Supplementary Figure 5. Knockdown of 14-3-3ζ alters the transcriptome of differentiating 3T3-L1 adipocytes at 24 and 48 hours. (a-b)** Panther gene ontology analysis was used to categorize transcriptome results of differentially expressed genes from 3T3-L1 adipocytes after 24 (a) and 48 (b) hours after differentiation. (RNA-Seq data were derived from n=5-6 mice per genotype).

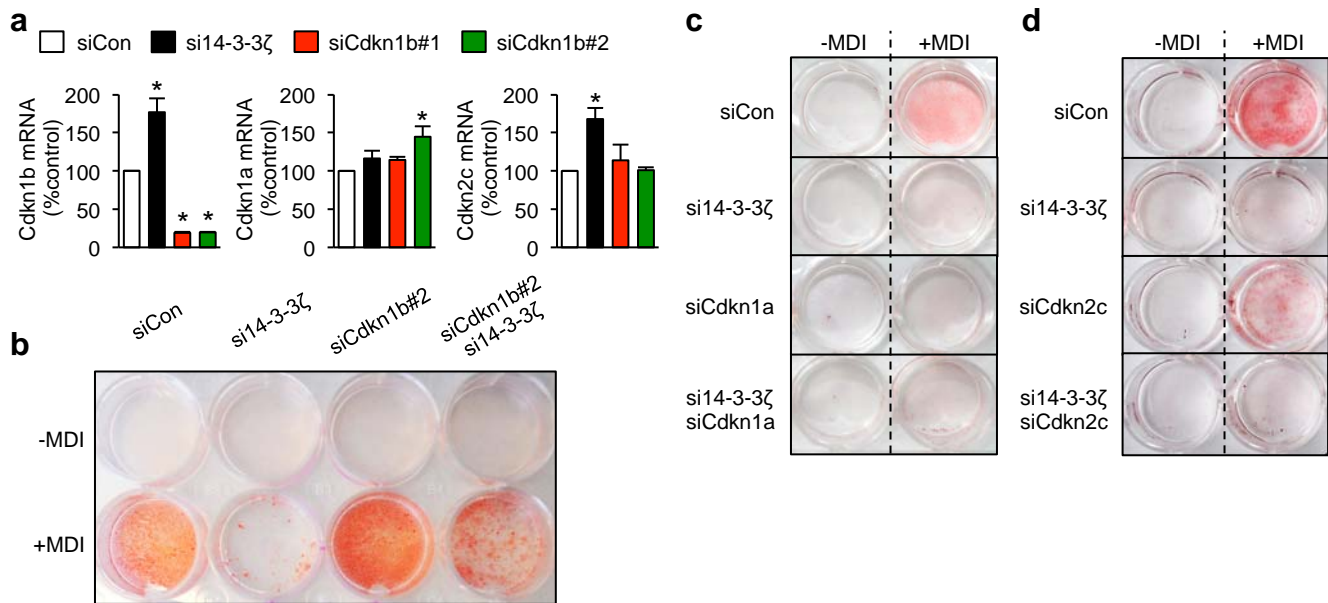

**Supplementary Figure 6. Knockdown of only *Cdkn1b/p27<sup>Kip1</sup>* was able to rescue the defect in differentiation of 14-3-3ζ-depleted cells.** (a) Two distinct siRNA duplexes were used to knockdown *Cdkn1b* in 3T3-L1 pre-adipocytes. Due to off-target effects on siCdkn1b#2 on *Cdkn1a* expression, only siCdkn1b#1 was used (n=4 per group, \*: p<0.05 when compared to siCon). (b) Co-transfection of siRNA against 14-3-3ζ and p27<sup>Kip1</sup> (siCdkn1b#2) was used to examine if knockdown of both proteins could restore differentiation, as determined by Oil Red-O staining (h). (n=4 independent experiments). (c,d) Co-transfection of siRNA against 14-3-3ζ and (c) *Cdkn1a/p21* or (d) *Cdkn2c/p18* was used to examine if knockdown of both proteins could restore differentiation, as determined by Oil Red-O staining (n=4 independent experiments). . Significant differences were assessed by one-way ANOVA and are indicated by \*: p<0.05. Error bars represent S.E.M.

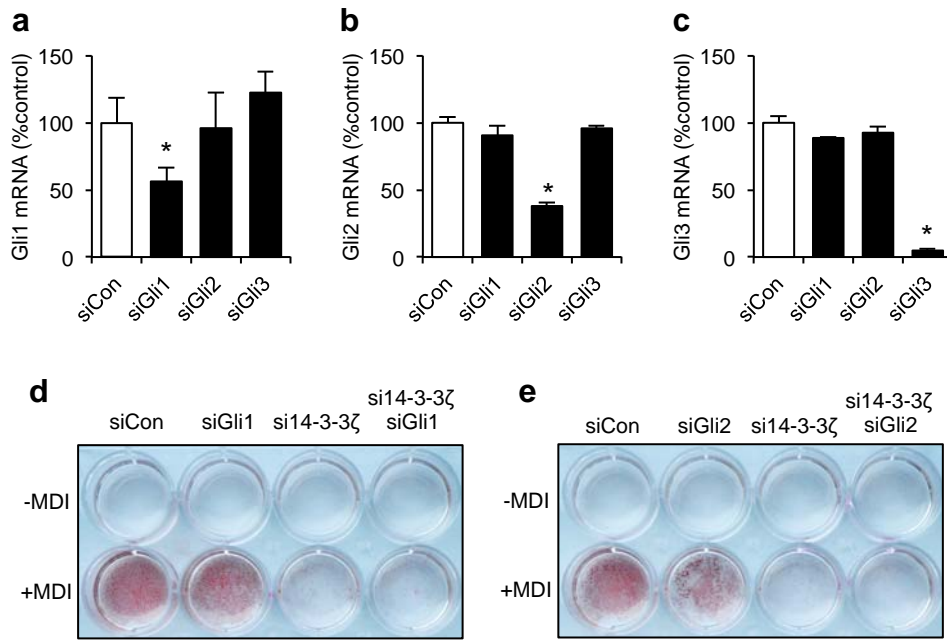

**Supplementary Figure 7. Knockdown of Gli1 or Gli2 was unable to restore differentiation in 14-3-3 $\zeta$ -depleted cells. (a-c)** 3T3-L1 pre-adipocytes were transfected with siRNA against Gli1 (a), Gli2 (b), and Gli3 (c), followed by RNA isolation, and qPCR to measure transfection efficiencies (n=4 per group). **(d,e)** Co-transfection of siRNA against 14-3-3 $\zeta$  and (d) Gli1 or (e) Gli2 was used to examine if knockdown of both proteins could restore differentiation, as determined by Oil Red-O staining (n=4 independent experiments). . Significant differences, as assessed by one-way ANOVA, are indicated by \*: p<0.05. Error bars represent S.EM.

**Fig. 1h**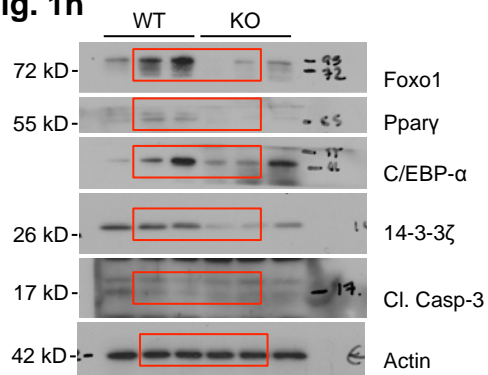**Fig. 2a**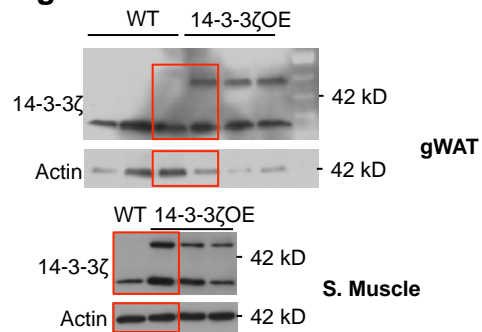**Fig. 3c**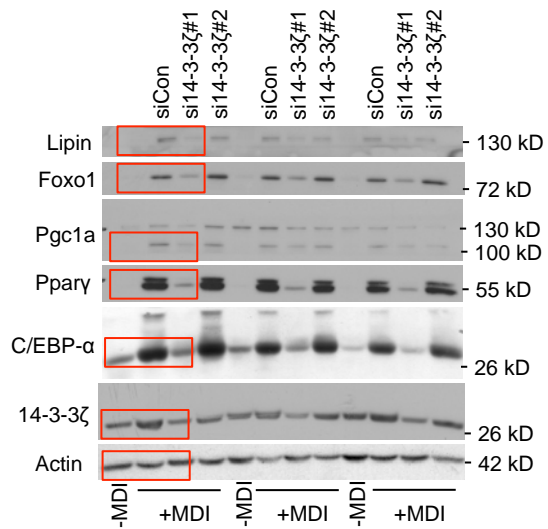**Fig. 3d**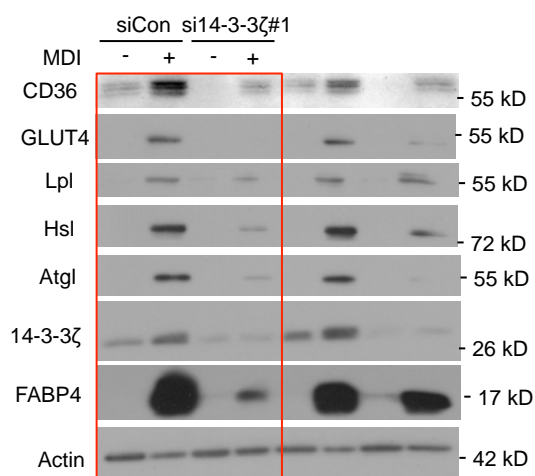**Supplementary Figure 8. Original Scans of Western Blots**



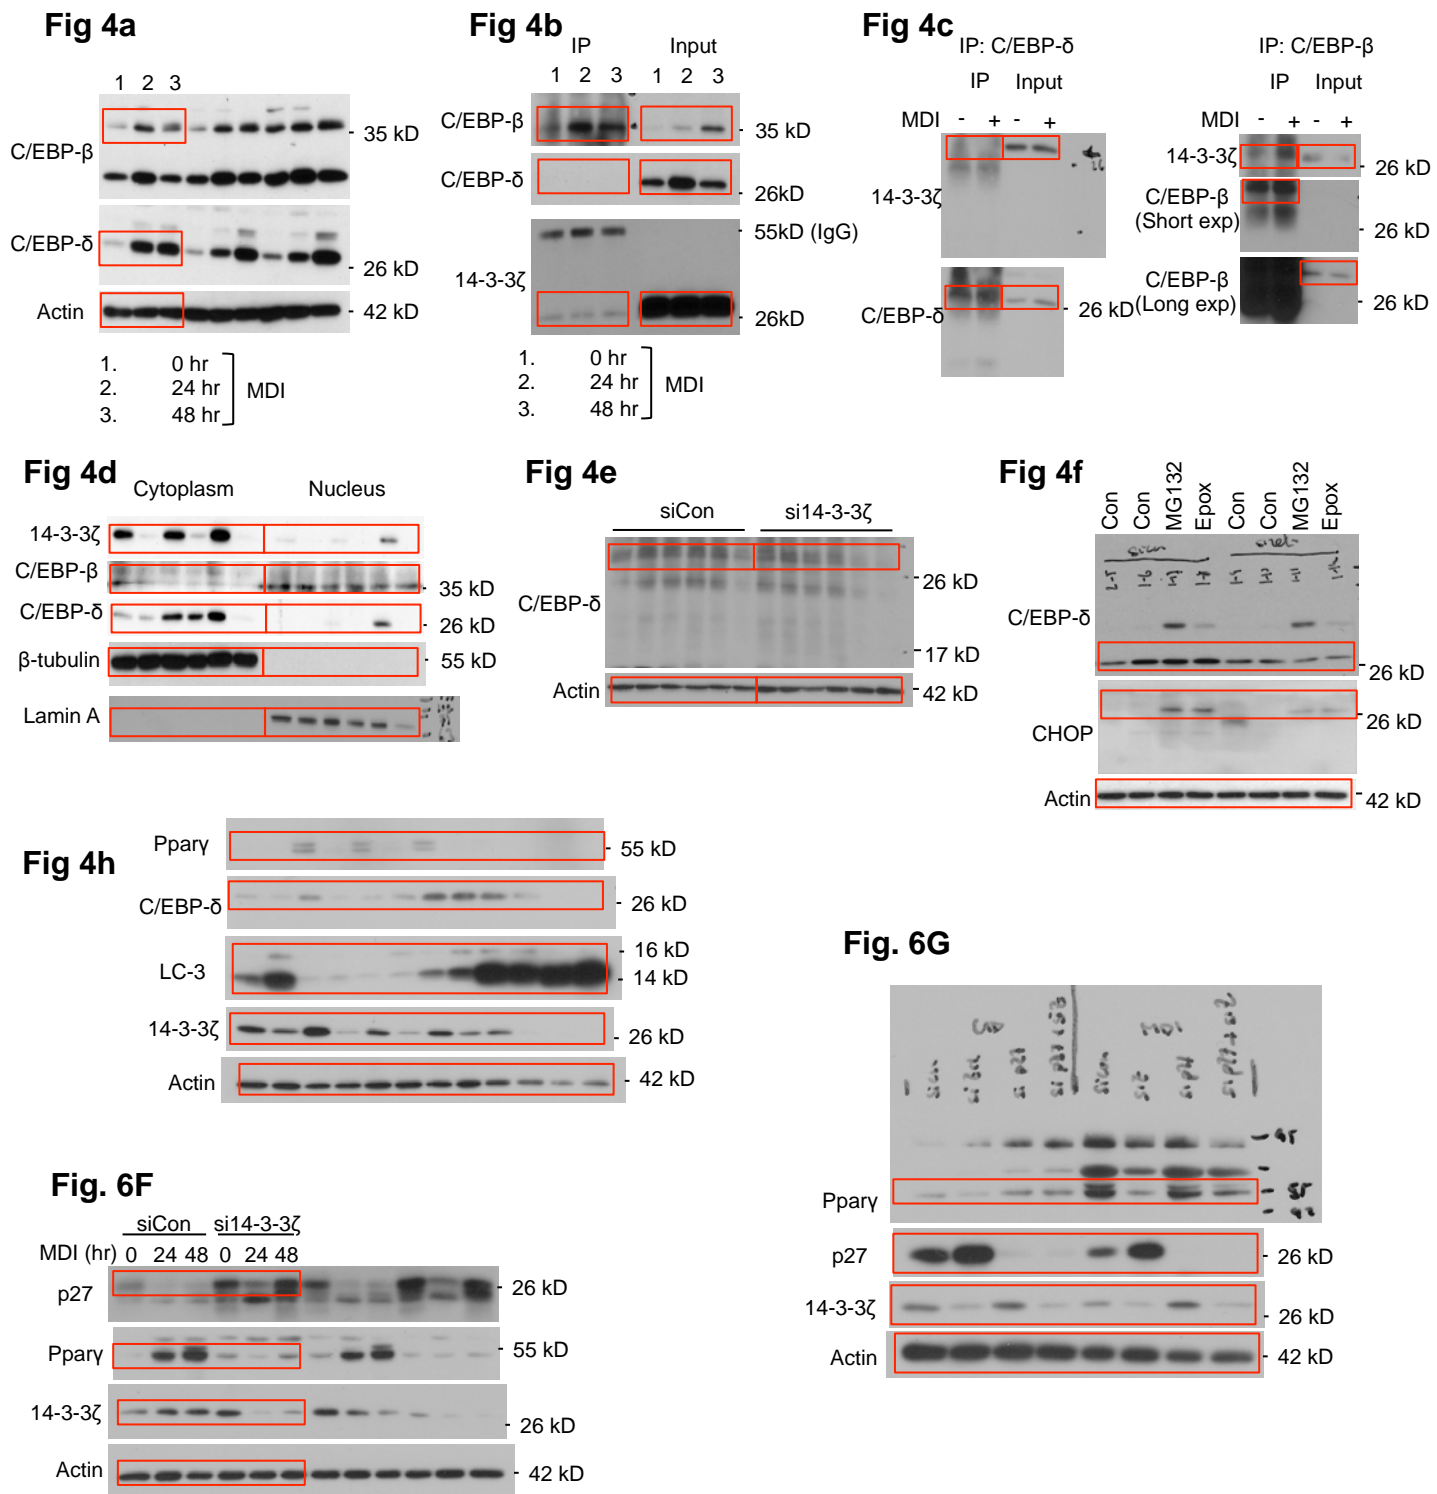

Supplementary Figure 8. Original Scans of Western Blots (Con)

**Fig. 7e**

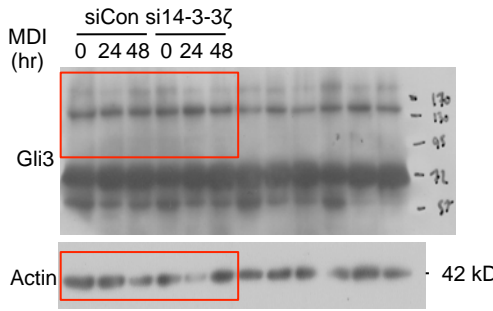

**Fig. 7f**

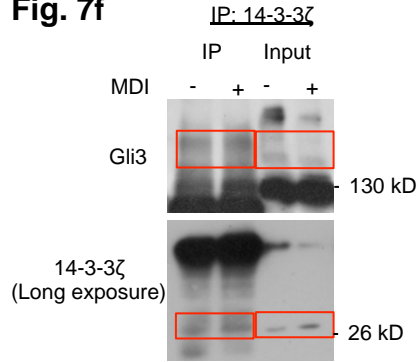

**Fig. 7g**

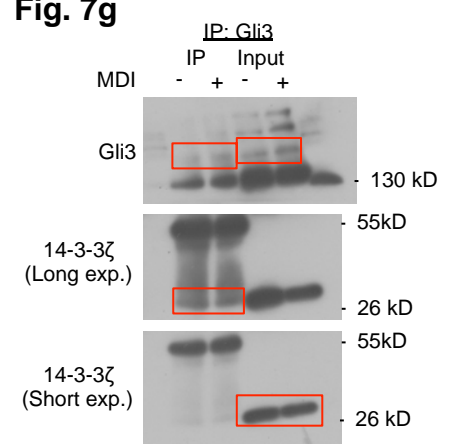

**Fig. 7i**

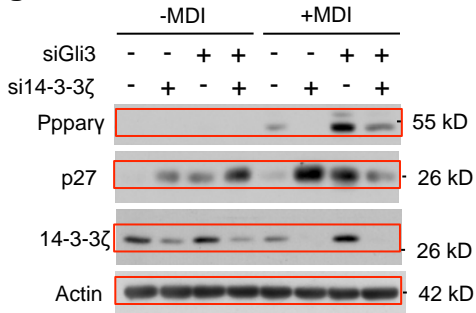

**Supplementary Figure 1i**

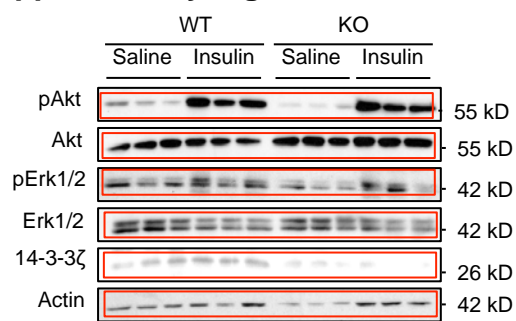

**Supplementary Figure 8. Original Scans of Western Blots (Con)**

**Supplementary Table 1: Fasting plasma hormone concentrations in wild-type and 14-3-3ζKO mice**

|                                      | <u>WT</u>       | <u>14-3-3ζKO</u> |
|--------------------------------------|-----------------|------------------|
| <b>Insulin</b><br>(ng/ ml)           | 0.34 ± 0.07     | 0.46 ± 0.06 *    |
| <b>Total adiponectin</b><br>(μg/ ml) | 4.08 ± 0.20     | 3.72 ± 0.21      |
| <b>HMW adiponectin</b><br>(μg/ ml)   | 2.34 ± 0.12     | 2.11 ± 0.33      |
| <b>Corticosterone</b><br>(ng/ ml)    | 337.01 ± 102.52 | 492.72 ± 106.03  |

---

n=5-7 per genotype

\*: p<0.05 when compared to control

Supplementary Table 2: Top and bottom 25 most changed genes after 48 hours of differentiation relative to siCon-transfected cells

|             |              | siCon |            |            | siZeta     |            |            |
|-------------|--------------|-------|------------|------------|------------|------------|------------|
|             |              | 0     | 24         | 48         | 0          | 24         | 48         |
| <b>1</b>    | Krt15        | 1     | 103.110918 | 497.311385 | 2.66051696 | 106.477924 | 145.796555 |
| <b>2</b>    | Fam83a       | 1     | 46.9124964 | 368.012974 | 13.9652891 | 16.5395541 | 31.0906177 |
| <b>3</b>    | Krt13        | 1     | 127.748073 | 164.971274 | 2.10433604 | 81.8750183 | 45.9900747 |
| <b>4</b>    | 2310014L17f  | 1     | 1.41740611 | 88.8011892 | 0.48230434 | 0.93882377 | 1.18106303 |
| <b>5</b>    | Nog          | 1     | 32.6942053 | 85.9266531 | 1.4719336  | 25.3915159 | 41.8079214 |
| <b>6</b>    | G0s2         | 1     | 8.61711945 | 84.4316184 | 0.35808763 | 1.04070388 | 5.65038824 |
| <b>7</b>    | Ren1         | 1     | 11.4951963 | 82.4971445 | 0          | 2.50361952 | 25.099235  |
| <b>8</b>    | Retn         | 1     | 9.39441789 | 63.502244  | 0.78129008 | 4.25782917 | 5.98152364 |
| <b>9</b>    | Klra17       | 1     | 0.25956822 | 45.3978432 | 2.8325008  | 0.18471283 | 13.8490692 |
| <b>10</b>   | Wnt4         | 1     | 15.9620244 | 45.3354564 | 0.76280073 | 24.8068077 | 45.1882186 |
| <b>11</b>   | Fam107a      | 1     | 3.09442691 | 44.2671316 | 0.47626856 | 6.86753891 | 89.1542819 |
| <b>12</b>   | Ramp3        | 1     | 135.193704 | 44.0992625 | 1.60991663 | 48.1753458 | 13.8392369 |
| <b>13</b>   | Cidec        | 1     | 6.49830578 | 40.2399565 | 0.44840159 | 1.500989   | 3.58758375 |
| <b>14</b>   | Arxes1       | 1     | 3.02212458 | 37.401903  | 0.9221424  | 5.72310422 | 8.75339344 |
| <b>16</b>   | Wfdc12       | 1     | 3.51105395 | 27.2384208 | 1.12254452 | 4.75851608 | 5.40723019 |
| <b>17</b>   | Sprr1b       | 1     | 89.5338408 | 23.7858685 | 0          | 27.95191   | 2.29093426 |
| <b>18</b>   | 2210020M01   | 1     | 6.13623433 | 23.0792172 | 0.61979871 | 3.01962916 | 7.39391541 |
| <b>19</b>   | Sema3g       | 1     | 11.1457743 | 22.8030941 | 0.34652529 | 10.4947652 | 8.8418583  |
| <b>20</b>   | Gpd1         | 1     | 1.31666881 | 21.5113343 | 1.07285388 | 1.18917206 | 4.2092994  |
| <b>21</b>   | Rasd1        | 1     | 3.87338682 | 20.9617456 | 1.31982267 | 6.70150905 | 8.04514435 |
| <b>22</b>   | Ear2         | 1     | 8.46312165 | 20.706659  | 0          | 4.16784271 | 4.34382435 |
| <b>23</b>   | Cfd          | 1     | 1.50353483 | 20.5678042 | 0.7495344  | 0.23013684 | 1.74720513 |
| <b>24</b>   | Gm12347,Krl  | 1     | 23.300067  | 18.3841511 | 0.63432479 | 22.6639369 | 12.0704546 |
| <b>25</b>   | Mcam         | 1     | 5.38954757 | 18.2322709 | 2.55386429 | 3.34622458 | 5.3578282  |
| <b>9221</b> | Apol9b       | 1     | 0.08373423 | 0.01948934 | 0.60923863 | 0.06082538 | 0.02648439 |
| <b>9222</b> | Zbp1         | 1     | 0.0742234  | 0.01943856 | 0.41698993 | 0.02447823 | 0.0173708  |
| <b>9223</b> | Oas3         | 1     | 0.07558769 | 0.01918292 | 0.47856067 | 0.01535832 | 0.01746165 |
| <b>9224</b> | Ifi47,Olfr56 | 1     | 0.04992641 | 0.0163962  | 0.59134299 | 0.02718881 | 0.02831703 |
| <b>9225</b> | BC023105     | 1     | 0.06714218 | 0.01464959 | 0.3617296  | 0.04433502 | 0.11591034 |
| <b>9226</b> | Pde1b        | 1     | 0.02099799 | 0.01344245 | 1.13107782 | 0.02510594 | 0.00967196 |
| <b>9227</b> | Gpr176       | 1     | 0.02035509 | 0.01135962 | 0.93039992 | 0.02116034 | 0.01790346 |
| <b>9228</b> | Mmp13        | 1     | 0.02023406 | 0.01093638 | 0.27693908 | 0.00582188 | 0.00528267 |
| <b>9229</b> | Serp1b9g     | 1     | 0.26502259 | 0.0107546  | 0.29989923 | 0.11016691 | 0.03022964 |
| <b>9230</b> | Ces1a        | 1     | 0.05015896 | 0.01048362 | 0.81041207 | 0.04175486 | 0.01681023 |
| <b>9231</b> | Vnn3         | 1     | 0.08024184 | 0.01027809 | 0.42577837 | 0.00669902 | 0.02750213 |
| <b>9232</b> | Ubd          | 1     | 0.00266743 | 0.00997673 | 1.67059581 | 0.01285738 | 0.01558555 |
| <b>9233</b> | Il1a         | 1     | 0.01260677 | 0.00964124 | 0.49442405 | 0.00619738 | 0.01258758 |
| <b>9234</b> | Nov          | 1     | 0.03553023 | 0.00944395 | 1.42627053 | 0.12325194 | 0.14244752 |
| <b>9235</b> | Rsad2        | 1     | 0.08694472 | 0.00941971 | 0.26700663 | 0.04735587 | 0.01091572 |
| <b>9236</b> | Mamdc2       | 1     | 0.02190166 | 0.00847977 | 0.58208341 | 0.02056469 | 0.01430511 |
| <b>9237</b> | Dlgap2       | 1     | 0.27744687 | 0.00742684 | 0.93054361 | 0.09900994 | 0.05647909 |
| <b>9238</b> | Siglecg      | 1     | 0.07252997 | 0.00722883 | 0.93852424 | 0.02480858 | 0.0091241  |
| <b>9239</b> | Gm12185,Tg   | 1     | 0.03304194 | 0.00669948 | 0.55308361 | 0.04808998 | 0.0012725  |
| <b>9240</b> | Gm4070       | 1     | 0.02262252 | 0.00616123 | 0.31498816 | 0.00391003 | 0.00578352 |
| <b>9241</b> | Mpeg1        | 1     | 0.03792581 | 0.00586986 | 0.25259452 | 0.01251313 | 0.00637423 |
| <b>9242</b> | Mmp8         | 1     | 0.04044817 | 0.00553258 | 0.33967777 | 0.02070749 | 0.01046043 |
| <b>9243</b> | I830012O16f  | 1     | 0.02556889 | 0.00407705 | 0.33324216 | 0.00908203 | 0.00616297 |
| <b>9244</b> | Ifit3        | 1     | 0.03142822 | 0.00382907 | 0.31572258 | 0.01235294 | 0.00424276 |
| <b>9245</b> | Tgtp2        | 1     | 0.01567832 | 0.0009063  | 0.3673668  | 0.02448039 | 0.00620549 |

Supplementary Table 3: Gene Set Enrichment Analysis for highly enriched genes in siCon-transfected 3T3-L1 cells at t=0 hr of differentiation

| Term ID    | Description                                                               | SIZE | ES         | NES       | NOM p-val  | FDR q-val | FWER p-val | RANK AT MAX | LEADING EDGE                    |
|------------|---------------------------------------------------------------------------|------|------------|-----------|------------|-----------|------------|-------------|---------------------------------|
| GO:0055114 | oxidation-reduction process                                               | 542  | 0.19408107 | 5.144256  | 0          | 0         | 0          | 9295        | tags=47%, list=28%, signal=64%  |
| GO:0043207 | response to external biotic stimulus                                      | 407  | 0.20895255 | 4.9130325 | 0          | 0         | 0          | 8659        | tags=47%, list=26%, signal=62%  |
| GO:0001817 | regulation of cytokine production                                         | 371  | 0.22158052 | 4.882406  | 0          | 0         | 0          | 8667        | tags=48%, list=26%, signal=64%  |
| GO:0009607 | response to biotic stimulus                                               | 419  | 0.20515685 | 4.811199  | 0          | 0         | 0          | 8659        | tags=46%, list=26%, signal=62%  |
| GO:0022603 | regulation of anatomical structure morphogenesis                          | 598  | 0.16492768 | 4.7478986 | 0          | 0         | 0          | 8626        | tags=42%, list=26%, signal=56%  |
| GO:0009611 | response to wounding                                                      | 353  | 0.21167463 | 4.528433  | 0          | 0         | 0          | 10556       | tags=53%, list=32%, signal=76%  |
| GO:0072521 | purine-containing compound metabolic process                              | 408  | 0.18785776 | 4.357321  | 0          | 0         | 0          | 8662        | tags=45%, list=26%, signal=60%  |
| GO:0044087 | regulation of cellular component biogenesis                               | 355  | 0.19560497 | 4.2718105 | 0          | 0         | 0          | 8551        | tags=45%, list=26%, signal=60%  |
| GO:0050776 | regulation of immune response                                             | 342  | 0.19733883 | 4.2676053 | 0          | 0         | 0          | 11589       | tags=54%, list=25%, signal=83%  |
| GO:0043062 | extracellular structure organization                                      | 144  | 0.28958005 | 4.116184  | 0          | 0         | 0          | 8654        | tags=55%, list=26%, signal=74%  |
| GO:0030198 | extracellular matrix organization                                         | 143  | 0.28640112 | 4.0330143 | 0          | 0         | 0          | 8654        | tags=55%, list=26%, signal=73%  |
| GO:0008285 | negative regulation of cell proliferation                                 | 468  | 0.16432111 | 3.9995213 | 0          | 0         | 0          | 8609        | tags=42%, list=26%, signal=56%  |
| GO:0016477 | cell migration                                                            | 520  | 0.15089844 | 3.8994722 | 0          | 0         | 0          | 9064        | tags=42%, list=27%, signal=57%  |
| GO:0001934 | positive regulation of protein phosphorylation                            | 497  | 0.15205948 | 3.8695254 | 0          | 0         | 0          | 8667        | tags=41%, list=26%, signal=55%  |
| GO:0043523 | regulation of neuron apoptotic process                                    | 177  | 0.24906825 | 3.820211  | 0          | 0         | 0          | 8481        | tags=50%, list=26%, signal=67%  |
| GO:0010638 | positive regulation of organelle organization                             | 229  | 0.21925238 | 3.8053563 | 0          | 0         | 0          | 8586        | tags=48%, list=26%, signal=64%  |
| GO:1901137 | carbohydrate derivative biosynthetic process                              | 266  | 0.19304864 | 3.654203  | 0          | 0         | 0          | 8632        | tags=45%, list=26%, signal=60%  |
| GO:0030155 | regulation of cell adhesion                                               | 256  | 0.19730611 | 3.6112642 | 0          | 0         | 0          | 8556        | tags=45%, list=26%, signal=61%  |
| GO:0050865 | regulation of cell activation                                             | 335  | 0.16510855 | 3.5227149 | 0          | 0         | 0          | 8659        | tags=42%, list=26%, signal=57%  |
| GO:0040007 | growth                                                                    | 311  | 0.16710086 | 3.4432998 | 0          | 0         | 0          | 8501        | tags=42%, list=26%, signal=56%  |
| GO:0050890 | cognition                                                                 | 185  | 0.21452352 | 3.4257956 | 0          | 0         | 0          | 9082        | tags=49%, list=27%, signal=67%  |
| GO:0001775 | cell activation                                                           | 399  | 0.14664754 | 3.4140747 | 0          | 0         | 0          | 8682        | tags=41%, list=26%, signal=54%  |
| GO:0006605 | protein targeting                                                         | 183  | 0.21082048 | 3.329797  | 0          | 0         | 0          | 8654        | tags=47%, list=26%, signal=63%  |
| GO:0043900 | regulation of multi-organism process                                      | 149  | 0.23285142 | 3.2849424 | 0          | 0         | 0          | 8359        | tags=48%, list=25%, signal=64%  |
| GO:0007610 | behavior                                                                  | 462  | 0.13167499 | 3.1834327 | 0          | 0         | 0          | 10580       | tags=45%, list=26%, signal=65%  |
| GO:0048771 | tissue remodeling                                                         | 89   | 0.29241267 | 3.297901  | 0          | 0         | 0          | 8609        | tags=55%, list=26%, signal=74%  |
| GO:0019725 | cellular homeostasis                                                      | 394  | 0.14217415 | 3.294836  | 0          | 0         | 0          | 8662        | tags=40%, list=26%, signal=54%  |
| GO:0048609 | multicellular organismal reproductive process                             | 459  | 0.13473064 | 3.28107   | 0          | 0         | 0          | 9635        | tags=42%, list=29%, signal=59%  |
| GO:0051090 | regulation of sequence-specific DNA binding transcription factor activity | 274  | 0.17154701 | 3.2702584 | 0          | 0         | 0          | 9026        | tags=44%, list=27%, signal=60%  |
| GO:0072593 | reactive oxygen species metabolic process                                 | 67   | 0.34582606 | 3.2687361 | 0          | 0         | 0          | 8871        | tags=61%, list=27%, signal=83%  |
| GO:0001816 | cytokine production                                                       | 95   | 0.27701637 | 3.1835132 | 0          | 0         | 0          | 7965        | tags=52%, list=24%, signal=68%  |
| GO:0034660 | ncRNA metabolic process                                                   | 129  | 0.2359121  | 3.1712277 | 0          | 0         | 0          | 8682        | tags=50%, list=26%, signal=67%  |
| GO:0014070 | response to organic cyclic compound                                       | 407  | 0.13599451 | 3.1596463 | 0          | 0         | 0          | 8686        | tags=40%, list=26%, signal=53%  |
| GO:0048666 | neuron development                                                        | 512  | 0.12094986 | 3.1073432 | 0          | 1.31E-05  | 0.002      | 9223        | tags=40%, list=28%, signal=54%  |
| GO:0008283 | cell proliferation                                                        | 433  | 0.12619744 | 3.092265  | 0          | 1.30E-05  | 0.002      | 8682        | tags=39%, list=26%, signal=52%  |
| GO:0003014 | renal system process                                                      | 64   | 0.32456008 | 3.055742  | 0          | 1.26E-05  | 0.002      | 10010       | tags=63%, list=30%, signal=89%  |
| GO:0009636 | response to toxic substance                                               | 79   | 0.28783017 | 3.0021021 | 0          | 1.19E-05  | 0.002      | 8550        | tags=54%, list=26%, signal=73%  |
| GO:0034470 | ncRNA processing                                                          | 91   | 0.26707628 | 2.93926   | 0          | 1.06E-05  | 0.002      | 8682        | tags=53%, list=26%, signal=71%  |
| GO:0007568 | aging                                                                     | 87   | 0.26652527 | 2.9320092 | 0          | 1.05E-05  | 0.002      | 8359        | tags=52%, list=25%, signal=69%  |
| GO:1901615 | organic hydroxy compound metabolic process                                | 244  | 0.16002825 | 2.9219627 | 0          | 1.04E-05  | 0.002      | 9980        | tags=46%, list=30%, signal=65%  |
| GO:0006790 | sulfur compound metabolic process                                         | 136  | 0.21240489 | 2.862802  | 0          | 2.47E-05  | 0.005      | 8613        | tags=47%, list=26%, signal=63%  |
| GO:0043161 | proteasomal ubiquitin-dependent protein catabolic process                 | 104  | 0.2336874  | 2.8272424 | 0          | 2.36E-05  | 0.005      | 8559        | tags=49%, list=26%, signal=66%  |
| GO:0001654 | eye development                                                           | 281  | 0.1430896  | 2.8267546 | 0          | 2.35E-05  | 0.005      | 9363        | tags=42%, list=28%, signal=58%  |
| GO:0010038 | response to metal ion                                                     | 155  | 0.19488443 | 2.824612  | 0          | 2.32E-05  | 0.005      | 8995        | tags=46%, list=27%, signal=63%  |
| GO:0072001 | renal system development                                                  | 187  | 0.17082882 | 2.7811756 | 0          | 3.49E-05  | 0.008      | 8576        | tags=43%, list=26%, signal=57%  |
| GO:0051186 | cofactor metabolic process                                                | 184  | 0.17474271 | 2.765697  | 0          | 4.62E-05  | 0.01       | 8678        | tags=43%, list=26%, signal=59%  |
| GO:0006109 | regulation of carbohydrate metabolic process                              | 119  | 0.21456815 | 2.7228172 | 0          | 5.98E-05  | 0.014      | 9376        | tags=50%, list=28%, signal=69%  |
| GO:2000377 | regulation of reactive oxygen species metabolic process                   | 63   | 0.28893685 | 2.715942  | 0          | 6.29E-05  | 0.015      | 8355        | tags=54%, list=25%, signal=72%  |
| GO:0061458 | reproductive system development                                           | 223  | 0.15969416 | 2.7109907 | 0          | 7.38E-05  | 0.018      | 8741        | tags=42%, list=26%, signal=57%  |
| GO:1901617 | organic hydroxy compound biosynthetic process                             | 90   | 0.24140081 | 2.691127  | 0          | 8.34E-05  | 0.021      | 10467       | tags=56%, list=31%, signal=81%  |
| GO:0043588 | skin development                                                          | 222  | 0.15162711 | 2.659821  | 0          | 1.17E-04  | 0.031      | 9370        | tags=43%, list=28%, signal=60%  |
| GO:0042157 | lipoprotein metabolic process                                             | 59   | 0.285632   | 2.5989594 | 0          | 2.00E-04  | 0.056      | 8553        | tags=54%, list=26%, signal=73%  |
| GO:0007267 | cell-cell signaling                                                       | 475  | 0.10305165 | 2.5694382 | 0          | 2.45E-04  | 0.071      | 8662        | tags=36%, list=26%, signal=48%  |
| GO:0006732 | coenzyme metabolic process                                                | 147  | 0.18224017 | 2.5620868 | 0.00198807 | 2.54E-04  | 0.075      | 8443        | tags=44%, list=25%, signal=58%  |
| GO:0030879 | mammary gland development                                                 | 97   | 0.21778959 | 2.4968085 | 0          | 3.55E-04  | 0.106      | 10604       | tags=54%, list=32%, signal=78%  |
| GO:0070646 | protein modification by small protein removal                             | 75   | 0.24913886 | 2.4934754 | 0          | 3.62E-04  | 0.109      | 8581        | tags=51%, list=26%, signal=68%  |
| GO:0021700 | developmental maturation                                                  | 172  | 0.16000745 | 2.4561114 | 0          | 4.56E-04  | 0.143      | 10172       | tags=47%, list=31%, signal=67%  |
| GO:0006091 | generation of precursor metabolites and energy                            | 132  | 0.1846152  | 2.4482758 | 0          | 4.87E-04  | 0.154      | 9251        | tags=46%, list=28%, signal=64%  |
| GO:0001503 | ossification                                                              | 142  | 0.17207217 | 2.400811  | 0.00193799 | 7.18E-04  | 0.226      | 8586        | tags=43%, list=26%, signal=58%  |
| GO:0009791 | post-embryonic development                                                | 98   | 0.20367227 | 2.3751075 | 0          | 8.36E-04  | 0.262      | 7158        | tags=42%, list=22%, signal=53%  |
| GO:0071229 | cellular response to acid                                                 | 110  | 0.19269532 | 2.3599732 | 0          | 9.13E-04  | 0.284      | 19912       | tags=79%, list=60%, signal=196% |

Supplementary Table 4: Gene Set Enrichment Analysis for highly enriched genes in si14-3-3ζ-transfected 3T3-L1 cells at t=0 hr of differentiation

| Term ID    | Description                                            | SIZE | ES         | NES        | NOM p-val | FDR q-val | FWER p-val | RANK AT MAX | LEADING EDGE                   |
|------------|--------------------------------------------------------|------|------------|------------|-----------|-----------|------------|-------------|--------------------------------|
| GO:0007049 | cell cycle                                             | 528  | -0.3056521 | -7.94206   | 0         | 0         | 0          | 8955        | tags=57%, list=27%, signal=77% |
| GO:0006259 | DNA metabolic process                                  | 401  | -0.2489749 | -5.759177  | 0         | 0         | 0          | 8904        | tags=51%, list=27%, signal=69% |
| GO:0018193 | peptidyl-amino acid modification                       | 410  | -0.2426255 | -5.5757174 | 0         | 0         | 0          | 8902        | tags=51%, list=27%, signal=68% |
| GO:0007059 | chromosome segregation                                 | 107  | -0.4349217 | -5.3092785 | 0         | 0         | 0          | 8893        | tags=70%, list=27%, signal=95% |
| GO:0055086 | nucleobase-containing small molecule metabolic process | 515  | -0.2022069 | -5.2696376 | 0         | 0         | 0          | 8942        | tags=47%, list=27%, signal=63% |
| GO:0016192 | vesicle-mediated transport                             | 489  | -0.1954034 | -4.900353  | 0         | 0         | 0          | 8967        | tags=46%, list=27%, signal=62% |
| GO:0051338 | regulation of transferase activity                     | 502  | -0.1830628 | -4.857795  | 0         | 0         | 0          | 8777        | tags=44%, list=26%, signal=59% |
| GO:0010608 | posttranscriptional regulation of gene expression      | 312  | -0.2196499 | -4.4571986 | 0         | 0         | 0          | 9072        | tags=49%, list=27%, signal=67% |
| GO:0016071 | mRNA metabolic process                                 | 179  | -0.2810754 | -4.451542  | 0         | 0         | 0          | 8910        | tags=55%, list=27%, signal=74% |
| GO:0043009 | chordate embryonic development                         | 565  | -0.1618644 | -4.417902  | 0         | 0         | 0          | 9188        | tags=44%, list=28%, signal=59% |
| GO:0030334 | regulation of cell migration                           | 446  | -0.1811758 | -4.3825593 | 0         | 0         | 0          | 8894        | tags=45%, list=27%, signal=60% |
| GO:0023014 | signal transduction by phosphorylation                 | 160  | -0.2971594 | -4.335813  | 0         | 0         | 0          | 8456        | tags=55%, list=25%, signal=73% |
| GO:0006396 | RNA processing                                         | 234  | -0.2419045 | -4.2817945 | 0         | 0         | 0          | 8924        | tags=51%, list=27%, signal=69% |
| GO:0080135 | regulation of cellular response to stress              | 306  | -0.208088  | -4.1767898 | 0         | 0         | 0          | 8902        | tags=47%, list=27%, signal=64% |
| GO:0007167 | enzyme linked receptor protein signaling pathway       | 372  | -0.1805735 | -4.079011  | 0         | 0         | 0          | 8902        | tags=45%, list=27%, signal=60% |
| GO:0007507 | heart development                                      | 375  | -0.1787231 | -4.0699983 | 0         | 0         | 0          | 8756        | tags=44%, list=26%, signal=59% |
| GO:0010639 | negative regulation of organelle organization          | 159  | -0.2807691 | -4.0543103 | 0         | 0         | 0          | 8904        | tags=55%, list=27%, signal=74% |
| GO:0006508 | proteolysis                                            | 341  | -0.1930983 | -4.023275  | 0         | 0         | 0          | 8858        | tags=46%, list=27%, signal=62% |
| GO:0044772 | mitotic cell cycle phase transition                    | 85   | -0.3715078 | -3.988436  | 0         | 0         | 0          | 6848        | tags=58%, list=21%, signal=72% |
| GO:0032886 | regulation of microtubule-based process                | 110  | -0.3330276 | -3.9558992 | 0         | 0         | 0          | 8915        | tags=60%, list=27%, signal=82% |
| GO:0007264 | small GTPase mediated signal transduction              | 102  | -0.3345701 | -3.9269848 | 0         | 0         | 0          | 8144        | tags=58%, list=24%, signal=76% |
| GO:0032259 | methylation                                            | 135  | -0.2895593 | -3.9095492 | 0         | 0         | 0          | 8885        | tags=56%, list=27%, signal=76% |
| GO:0061024 | membrane organization                                  | 354  | -0.1763437 | -3.8309417 | 0         | 0         | 0          | 8947        | tags=44%, list=27%, signal=60% |
| GO:0010563 | negative regulation of phosphorus metabolic process    | 291  | -0.1954303 | -3.827398  | 0         | 0         | 0          | 8300        | tags=44%, list=25%, signal=59% |
| GO:0051960 | regulation of nervous system development               | 543  | -0.1384103 | -3.6872585 | 0         | 0         | 0          | 8946        | tags=41%, list=27%, signal=55% |
| GO:0035295 | tube development                                       | 417  | -0.1529209 | -3.675426  | 0         | 0         | 0          | 9094        | tags=42%, list=27%, signal=58% |
| GO:0007163 | establishment or maintenance of cell polarity          | 91   | -0.3233953 | -3.656385  | 0         | 0         | 0          | 6451        | tags=52%, list=19%, signal=64% |
| GO:0040008 | regulation of growth                                   | 461  | -0.1448446 | -3.5984418 | 0         | 0         | 0          | 8884        | tags=41%, list=27%, signal=55% |
| GO:0032844 | regulation of homeostatic process                      | 282  | -0.1829575 | -3.5802863 | 0         | 0         | 0          | 9062        | tags=45%, list=27%, signal=62% |
| GO:0016197 | endosomal transport                                    | 101  | -0.2962198 | -3.4776554 | 0         | 0         | 0          | 8947        | tags=56%, list=27%, signal=77% |
| GO:0034329 | cell junction assembly                                 | 62   | -0.3737445 | -3.4713187 | 0         | 0         | 0          | 8513        | tags=63%, list=26%, signal=84% |
| GO:0016311 | dephosphorylation                                      | 185  | -0.2183339 | -3.466415  | 0         | 0         | 0          | 8958        | tags=49%, list=27%, signal=66% |
| GO:0042176 | regulation of protein catabolic process                | 170  | -0.2244362 | -3.4592838 | 0         | 0         | 0          | 8811        | tags=49%, list=26%, signal=66% |
| GO:2001234 | negative regulation of apoptotic signaling pathway     | 146  | -0.2411573 | -3.4360778 | 0         | 0         | 0          | 8871        | tags=51%, list=27%, signal=69% |
| GO:0022610 | biological adhesion                                    | 360  | -0.1547073 | -3.4122567 | 0         | 0         | 0          | 8675        | tags=41%, list=26%, signal=55% |
| GO:0009125 | nucleoside monophosphate catabolic process             | 173  | -0.2177962 | -3.3851202 | 0         | 0         | 0          | 8942        | tags=49%, list=27%, signal=66% |
| GO:0009725 | response to hormone stimulus                           | 363  | -0.1510749 | -3.3512826 | 0         | 0         | 0          | 8956        | tags=42%, list=27%, signal=57% |
| GO:0002009 | morphogenesis of an epithelium                         | 358  | -0.1555922 | -3.3489702 | 0         | 0         | 0          | 9094        | tags=43%, list=27%, signal=58% |
| GO:0006260 | DNA replication                                        | 85   | -0.3097296 | -3.3088357 | 0         | 0         | 0          | 8897        | tags=58%, list=27%, signal=79% |
| GO:0006397 | mRNA processing                                        | 118  | -0.2591716 | -3.3041995 | 0         | 0         | 0          | 8885        | tags=53%, list=27%, signal=71% |
| GO:0001501 | skeletal system development                            | 338  | -0.1541148 | -3.2663224 | 0         | 0         | 0          | 9095        | tags=43%, list=27%, signal=58% |
| GO:0005975 | carbohydrate metabolic process                         | 291  | -0.1595047 | -3.2057004 | 0         | 0         | 0          | 8570        | tags=42%, list=26%, signal=56% |
| GO:0044723 | single-organism carbohydrate metabolic process         | 279  | -0.1594094 | -3.0918698 | 0         | 0         | 0          | 8570        | tags=42%, list=26%, signal=56% |
| GO:0044782 | cilium organization                                    | 118  | -0.2346532 | -2.9884195 | 0         | 3.53E-06  | 0.001      | 8852        | tags=50%, list=27%, signal=68% |
| GO:0030010 | establishment of cell polarity                         | 63   | -0.3180787 | -2.978343  | 0         | 3.50E-06  | 0.001      | 6862        | tags=52%, list=21%, signal=66% |
| GO:0034330 | cell junction organization                             | 99   | -0.2523095 | -2.9613662 | 0         | 3.44E-06  | 0.001      | 8766        | tags=52%, list=26%, signal=70% |
| GO:0061061 | muscle structure development                           | 339  | -0.1393739 | -2.9450989 | 0         | 3.41E-06  | 0.001      | 8950        | tags=41%, list=27%, signal=55% |
| GO:0001655 | urogenital system development                          | 222  | -0.1711532 | -2.9394283 | 0         | 3.40E-06  | 0.001      | 7379        | tags=39%, list=22%, signal=50% |
| GO:0042110 | T cell activation                                      | 203  | -0.1657692 | -2.7623887 | 0         | 5.70E-05  | 0.019      | 11558       | tags=51%, list=35%, signal=78% |
| GO:0007389 | pattern specification process                          | 373  | -0.1253858 | -2.7555656 | 0         | 5.68E-05  | 0.019      | 9518        | tags=41%, list=29%, signal=57% |
| GO:0031669 | cellular response to nutrient levels                   | 77   | -0.2605761 | -2.7249963 | 0         | 6.44E-05  | 0.022      | 9062        | tags=53%, list=27%, signal=73% |
| GO:0045444 | fat cell differentiation                               | 69   | -0.2736957 | -2.7130942 | 0         | 6.68E-05  | 0.023      | 7304        | tags=49%, list=22%, signal=63% |
| GO:0040029 | regulation of gene expression, epigenetic              | 126  | -0.2059611 | -2.7013478 | 0         | 7.26E-05  | 0.025      | 7957        | tags=44%, list=24%, signal=58% |
| GO:0003002 | regionalization                                        | 272  | -0.1414191 | -2.6830518 | 0         | 7.77E-05  | 0.026      | 9518        | tags=43%, list=29%, signal=59% |
| GO:0050678 | regulation of epithelial cell proliferation            | 221  | -0.1583128 | -2.6724598 | 0         | 7.96E-05  | 0.027      | 9517        | tags=44%, list=29%, signal=62% |

Supplementary Table 5: Gene Set Enrichment Analysis for highly enriched genes in siCon-transfected 3T3-L1 cells at t=24 hr of differentiation

| Term ID    | Description                                                  | SIZE | ES         | NES       | NOM p-val | FDR q-val | FWER p-val | RANK AT MAX | LEADING EDGE                   |
|------------|--------------------------------------------------------------|------|------------|-----------|-----------|-----------|------------|-------------|--------------------------------|
| GO:0040012 | regulation of locomotion                                     | 497  | 0.21244763 | 5.387739  | 0         | 0         | 0          | 8094        | tags=45%, list=24%, signal=59% |
| GO:0006396 | RNA processing                                               | 234  | 0.29805347 | 5.2699904 | 0         | 0         | 0          | 8347        | tags=55%, list=25%, signal=73% |
| GO:0055086 | nucleobase-containing small molecule metabolic process       | 515  | 0.19650061 | 5.184911  | 0         | 0         | 0          | 8352        | tags=44%, list=25%, signal=58% |
| GO:0016265 | death                                                        | 558  | 0.18157847 | 4.9461055 | 0         | 0         | 0          | 8424        | tags=43%, list=25%, signal=57% |
| GO:0034660 | ncRNA metabolic process                                      | 129  | 0.34719357 | 4.5371804 | 0         | 0         | 0          | 8347        | tags=60%, list=25%, signal=79% |
| GO:0001817 | regulation of cytokine production                            | 371  | 0.19957583 | 4.492846  | 0         | 0         | 0          | 8315        | tags=45%, list=25%, signal=59% |
| GO:0044087 | regulation of cellular component biogenesis                  | 355  | 0.20390359 | 4.373157  | 0         | 0         | 0          | 8278        | tags=45%, list=25%, signal=59% |
| GO:0061061 | muscle structure development                                 | 339  | 0.20603824 | 4.2976737 | 0         | 0         | 0          | 9108        | tags=48%, list=27%, signal=65% |
| GO:0034470 | ncRNA processing                                             | 91   | 0.37635103 | 4.2853575 | 0         | 0         | 0          | 8347        | tags=63%, list=25%, signal=83% |
| GO:0022603 | regulation of anatomical structure morphogenesis             | 598  | 0.14927629 | 4.2661633 | 0         | 0         | 0          | 8303        | tags=40%, list=25%, signal=52% |
| GO:0043066 | negative regulation of apoptotic process                     | 529  | 0.16155359 | 4.224526  | 0         | 0         | 0          | 8227        | tags=41%, list=25%, signal=53% |
| GO:0009611 | response to wounding                                         | 353  | 0.19134147 | 4.1789083 | 0         | 0         | 0          | 7928        | tags=43%, list=24%, signal=56% |
| GO:0050776 | regulation of immune response                                | 342  | 0.19050147 | 4.049902  | 0         | 0         | 0          | 9675        | tags=48%, list=29%, signal=67% |
| GO:0050865 | regulation of cell activation                                | 335  | 0.18179357 | 3.973754  | 0         | 0         | 0          | 7812        | tags=41%, list=23%, signal=54% |
| GO:0043062 | extracellular structure organization                         | 144  | 0.2789935  | 3.9685378 | 0         | 0         | 0          | 7619        | tags=51%, list=23%, signal=65% |
| GO:0001934 | positive regulation of protein phosphorylation               | 497  | 0.15667813 | 3.965975  | 0         | 0         | 0          | 8315        | tags=40%, list=25%, signal=53% |
| GO:0030198 | extracellular matrix organization                            | 143  | 0.28254545 | 3.9466043 | 0         | 0         | 0          | 7619        | tags=51%, list=23%, signal=66% |
| GO:0008283 | cell proliferation                                           | 433  | 0.16311306 | 3.9462755 | 0         | 0         | 0          | 8392        | tags=41%, list=25%, signal=55% |
| GO:0001501 | skeletal system development                                  | 338  | 0.17928271 | 3.9216406 | 0         | 0         | 0          | 8363        | tags=43%, list=25%, signal=57% |
| GO:0010638 | positive regulation of organelle organization                | 229  | 0.21344368 | 3.7548091 | 0         | 0         | 0          | 8197        | tags=46%, list=25%, signal=60% |
| GO:0005975 | carbohydrate metabolic process                               | 291  | 0.18287592 | 3.656827  | 0         | 0         | 0          | 8369        | tags=43%, list=25%, signal=57% |
| GO:0001701 | in utero embryonic development                               | 360  | 0.16367608 | 3.6343331 | 0         | 0         | 0          | 8378        | tags=41%, list=25%, signal=55% |
| GO:0007517 | muscle organ development                                     | 194  | 0.2262331  | 3.6268895 | 0         | 0         | 0          | 10346       | tags=54%, list=23%, signal=77% |
| GO:0043900 | regulation of multi-organism process                         | 149  | 0.25343877 | 3.5959451 | 0         | 0         | 0          | 8347        | tags=50%, list=25%, signal=67% |
| GO:0044723 | single-organism carbohydrate metabolic process               | 279  | 0.18351737 | 3.5594027 | 0         | 0         | 0          | 8369        | tags=43%, list=25%, signal=57% |
| GO:0052548 | regulation of endopeptidase activity                         | 262  | 0.18440472 | 3.5022814 | 0         | 0         | 0          | 8257        | tags=43%, list=25%, signal=57% |
| GO:1901137 | carbohydrate derivative biosynthetic process                 | 266  | 0.18586287 | 3.5001419 | 0         | 0         | 0          | 8369        | tags=44%, list=25%, signal=58% |
| GO:0048878 | chemical homeostasis                                         | 581  | 0.1271358  | 3.4640484 | 0         | 0         | 0          | 8322        | tags=38%, list=25%, signal=49% |
| GO:0014070 | response to organic cyclic compound                          | 407  | 0.14382826 | 3.4259026 | 0         | 0         | 0          | 8347        | tags=39%, list=25%, signal=52% |
| GO:0007167 | enzyme linked receptor protein signaling pathway             | 372  | 0.15466899 | 3.4235928 | 0         | 0         | 0          | 7964        | tags=39%, list=24%, signal=51% |
| GO:0043207 | response to external biotic stimulus                         | 407  | 0.14570372 | 3.3971062 | 0         | 0         | 0          | 8122        | tags=39%, list=24%, signal=51% |
| GO:0009607 | response to biotic stimulus                                  | 419  | 0.1441654  | 3.3847375 | 0         | 0         | 0          | 8122        | tags=39%, list=24%, signal=51% |
| GO:0010038 | response to metal ion                                        | 155  | 0.23025984 | 3.3802621 | 0         | 0         | 0          | 10184       | tags=54%, list=31%, signal=77% |
| GO:0006027 | regulation of vesicle-mediated transport                     | 247  | 0.18369074 | 3.3723195 | 0         | 0         | 0          | 8341        | tags=43%, list=25%, signal=57% |
| GO:0001816 | cytokine production                                          | 95   | 0.29122534 | 3.3719344 | 0         | 0         | 0          | 9594        | tags=58%, list=29%, signal=81% |
| GO:0007155 | cell adhesion                                                | 353  | 0.15152316 | 3.3673992 | 0         | 0         | 0          | 8296        | tags=40%, list=25%, signal=53% |
| GO:0014706 | striated muscle tissue development                           | 240  | 0.18162338 | 3.3227522 | 0         | 0         | 0          | 8551        | tags=44%, list=26%, signal=58% |
| GO:0001775 | cell activation                                              | 399  | 0.1416936  | 3.3109164 | 0         | 0         | 0          | 7428        | tags=36%, list=22%, signal=46% |
| GO:0001503 | ossification                                                 | 142  | 0.22945707 | 3.2641237 | 0         | 0         | 0          | 8091        | tags=47%, list=24%, signal=62% |
| GO:0022610 | biological adhesion                                          | 360  | 0.14651184 | 3.2299366 | 0         | 0         | 0          | 8296        | tags=39%, list=25%, signal=52% |
| GO:0006732 | coenzyme metabolic process                                   | 147  | 0.2231046  | 3.1844828 | 0         | 0         | 0          | 7995        | tags=46%, list=24%, signal=61% |
| GO:0048660 | regulation of smooth muscle cell proliferation               | 89   | 0.2832502  | 3.1780713 | 0         | 0         | 0          | 7792        | tags=52%, list=23%, signal=67% |
| GO:0051186 | cofactor metabolic process                                   | 184  | 0.19613604 | 3.1538174 | 0         | 0         | 0          | 8332        | tags=45%, list=25%, signal=59% |
| GO:1901566 | organonitrogen compound biosynthetic process                 | 290  | 0.1602083  | 3.1329267 | 0         | 6.40E-06  | 0.001      | 8363        | tags=41%, list=25%, signal=54% |
| GO:0040007 | growth                                                       | 311  | 0.15136005 | 3.1053603 | 0         | 6.25E-06  | 0.001      | 8378        | tags=40%, list=25%, signal=53% |
| GO:0003006 | developmental process involved in reproduction               | 382  | 0.13212433 | 2.9544032 | 0         | 2.20E-05  | 0.004      | 8452        | tags=38%, list=25%, signal=51% |
| GO:0071826 | ribonucleoprotein complex subunit organization               | 84   | 0.27344772 | 2.938143  | 0         | 2.16E-05  | 0.004      | 8347        | tags=52%, list=25%, signal=70% |
| GO:0001655 | urogenital system development                                | 222  | 0.16573142 | 2.8966348 | 0         | 2.06E-05  | 0.004      | 8305        | tags=41%, list=25%, signal=55% |
| GO:0061458 | reproductive system development                              | 223  | 0.16713199 | 2.8827765 | 0         | 3.05E-05  | 0.006      | 8048        | tags=41%, list=24%, signal=53% |
| GO:0045444 | fat cell differentiation                                     | 69   | 0.2955547  | 2.8734424 | 0         | 3.02E-05  | 0.006      | 4649        | tags=43%, list=14%, signal=50% |
| GO:0022411 | cellular component disassembly                               | 73   | 0.28149635 | 2.8613145 | 0         | 3.97E-05  | 0.008      | 8424        | tags=53%, list=25%, signal=71% |
| GO:0048863 | stem cell differentiation                                    | 238  | 0.15504247 | 2.7845647 | 0         | 6.54E-05  | 0.014      | 8293        | tags=40%, list=25%, signal=53% |
| GO:0015931 | nucleobase-containing compound transport                     | 62   | 0.30122462 | 2.778344  | 0         | 6.95E-05  | 0.015      | 7700        | tags=53%, list=23%, signal=69% |
| GO:0060348 | bone development                                             | 114  | 0.22394072 | 2.764853  | 0         | 7.25E-05  | 0.016      | 8329        | tags=47%, list=25%, signal=63% |
| GO:0006790 | sulfur compound metabolic process                            | 136  | 0.19975239 | 2.731951  | 0         | 8.86E-05  | 0.02       | 8543        | tags=46%, list=26%, signal=61% |
| GO:0010498 | proteasomal protein catabolic process                        | 110  | 0.22406119 | 2.7018383 | 0         | 1.05E-04  | 0.025      | 7990        | tags=46%, list=24%, signal=61% |
| GO:0008015 | blood circulation                                            | 232  | 0.1518458  | 2.6832983 | 0         | 1.22E-04  | 0.03       | 4588        | tags=29%, list=14%, signal=33% |
| GO:0048589 | developmental growth                                         | 182  | 0.1720337  | 2.6730757 | 0         | 1.27E-04  | 0.032      | 8378        | tags=42%, list=25%, signal=56% |
| GO:0006275 | regulation of DNA replication                                | 92   | 0.23780353 | 2.6515293 | 0         | 1.60E-04  | 0.04       | 8378        | tags=49%, list=25%, signal=65% |
| GO:0021700 | developmental maturation                                     | 172  | 0.16876563 | 2.631705  | 0         | 1.87E-04  | 0.048      | 8529        | tags=42%, list=26%, signal=57% |
| GO:0072001 | renal system development                                     | 187  | 0.16289128 | 2.6150043 | 0         | 1.98E-04  | 0.052      | 8305        | tags=41%, list=25%, signal=55% |
| GO:0006091 | generation of precursor metabolites and energy               | 132  | 0.19427703 | 2.6053846 | 0         | 2.00E-04  | 0.053      | 8931        | tags=46%, list=27%, signal=63% |
| GO:0007568 | aging                                                        | 87   | 0.23607044 | 2.589664  | 0         | 2.22E-04  | 0.06       | 7458        | tags=46%, list=22%, signal=59% |
| GO:0048864 | stem cell development                                        | 182  | 0.1635545  | 2.5591557 | 0         | 2.94E-04  | 0.083      | 8293        | tags=41%, list=25%, signal=55% |
| GO:0001890 | placenta development                                         | 134  | 0.18513672 | 2.5143604 | 0         | 3.49E-04  | 0.104      | 7764        | tags=42%, list=23%, signal=54% |
| GO:0007610 | behavior                                                     | 462  | 0.10307307 | 2.5114343 | 0         | 3.63E-04  | 0.108      | 8351        | tags=35%, list=25%, signal=46% |
| GO:0043467 | regulation of generation of precursor metabolites and energy | 63   | 0.26253107 | 2.492855  | 0         | 3.97E-04  | 0.121      | 10287       | tags=57%, list=31%, signal=83% |

Supplementary Table 6: Gene Set Enrichment Analysis for highly enriched genes in si14-3-3 $\zeta$ -transfected 3T3-L1 cells at t=24 hr of differentiation

| Term ID    | Description                                       | SIZE | ES         | NES        | NOM p-val  | FDR q-val | FWER p-val | RANK AT MAX | LEADING EDGE                    |
|------------|---------------------------------------------------|------|------------|------------|------------|-----------|------------|-------------|---------------------------------|
| GO:0007049 | cell cycle                                        | 528  | -0.2831359 | -7.4872613 | 0          | 0         | 0          | 9188        | tags=55%, list=28%, signal=75%  |
| GO:0007017 | microtubule-based process                         | 310  | -0.3144054 | -6.467956  | 0          | 0         | 0          | 9166        | tags=59%, list=28%, signal=80%  |
| GO:0019236 | response to pheromone                             | 81   | -0.6070486 | -6.373813  | 0          | 0         | 0          | 11064       | tags=94%, list=33%, signal=140% |
| GO:0032990 | cell part morphogenesis                           | 432  | -0.2505095 | -5.991905  | 0          | 0         | 0          | 9175        | tags=52%, list=28%, signal=71%  |
| GO:0006508 | proteolysis                                       | 432  | -0.2505095 | -5.991905  | 0          | 0         | 0          | 9175        | tags=52%, list=28%, signal=71%  |
| GO:0044782 | cilium organization                               | 118  | -0.4375238 | -5.7203217 | 0          | 0         | 0          | 9175        | tags=71%, list=28%, signal=98%  |
| GO:0019439 | aromatic compound catabolic process               | 459  | -0.2322176 | -5.674294  | 0          | 0         | 0          | 9193        | tags=51%, list=28%, signal=69%  |
| GO:0006259 | DNA metabolic process                             | 401  | -0.2427018 | -5.6556363 | 0          | 0         | 0          | 9193        | tags=52%, list=28%, signal=70%  |
| GO:0006325 | chromatin organization                            | 309  | -0.2697313 | -5.4739413 | 0          | 0         | 0          | 9194        | tags=54%, list=28%, signal=74%  |
| GO:0051301 | cell division                                     | 177  | -0.3343362 | -5.2775636 | 0          | 0         | 0          | 8105        | tags=58%, list=24%, signal=76%  |
| GO:1901657 | glycosyl compound metabolic process               | 364  | -0.2324466 | -5.071288  | 0          | 0         | 0          | 9165        | tags=51%, list=28%, signal=69%  |
| GO:0016192 | vesicle-mediated transport                        | 489  | -0.1946403 | -5.0183825 | 0          | 0         | 0          | 9196        | tags=47%, list=28%, signal=64%  |
| GO:0018193 | peptidyl-amino acid modification                  | 410  | -0.2175443 | -4.9818916 | 0          | 0         | 0          | 9158        | tags=49%, list=28%, signal=67%  |
| GO:0051338 | regulation of transferase activity                | 502  | -0.194784  | -4.980715  | 0          | 0         | 0          | 9188        | tags=54%, list=28%, signal=64%  |
| GO:0072521 | purine-containing compound metabolic process      | 408  | -0.2048624 | -4.8410153 | 0          | 0         | 0          | 9165        | tags=48%, list=28%, signal=65%  |
| GO:0007059 | chromosome segregation                            | 107  | -0.382943  | -4.7907443 | 0          | 0         | 0          | 9062        | tags=65%, list=27%, signal=90%  |
| GO:0080135 | regulation of cellular response to stress         | 306  | -0.2170521 | -4.579681  | 0          | 0         | 0          | 9150        | tags=49%, list=28%, signal=67%  |
| GO:0030029 | actin filament-based process                      | 273  | -0.2200338 | -4.283411  | 0          | 0         | 0          | 9066        | tags=49%, list=27%, signal=67%  |
| GO:0009314 | response to radiation                             | 265  | -0.2234595 | -4.1502066 | 0          | 0         | 0          | 9193        | tags=47%, list=28%, signal=68%  |
| GO:0043009 | chordate embryonic development                    | 565  | -0.1529663 | -4.1352863 | 0          | 0         | 0          | 9420        | tags=43%, list=28%, signal=59%  |
| GO:0010608 | posttranscriptional regulation of gene expression | 312  | -0.1975655 | -4.064476  | 0          | 0         | 0          | 9160        | tags=47%, list=28%, signal=64%  |
| GO:0032886 | regulation of microtubule-based process           | 110  | -0.3247903 | -4.0476723 | 0          | 0         | 0          | 9188        | tags=60%, list=28%, signal=83%  |
| GO:0035295 | tube development                                  | 417  | -0.1643281 | -4.003794  | 0          | 0         | 0          | 8241        | tags=41%, list=25%, signal=54%  |
| GO:0051052 | regulation of DNA metabolic process               | 226  | -0.2308524 | -3.9971397 | 0          | 0         | 0          | 9150        | tags=50%, list=28%, signal=69%  |
| GO:0043065 | positive regulation of apoptotic process          | 325  | -0.1887853 | -3.935051  | 0          | 0         | 0          | 8825        | tags=45%, list=27%, signal=61%  |
| GO:0016311 | dephosphorylation                                 | 185  | -0.2495791 | -3.9343326 | 0          | 0         | 0          | 9183        | tags=52%, list=28%, signal=72%  |
| GO:0009125 | nucleoside monophosphate catabolic process        | 173  | -0.2517288 | -3.8621404 | 0          | 0         | 0          | 9165        | tags=53%, list=28%, signal=72%  |
| GO:0000910 | cytokinesis                                       | 62   | -0.4175927 | -3.8414881 | 0          | 0         | 0          | 7594        | tags=65%, list=23%, signal=83%  |
| GO:0040008 | regulation of growth                              | 461  | -0.1533582 | -3.7960684 | 0          | 0         | 0          | 9254        | tags=43%, list=28%, signal=59%  |
| GO:0016071 | mRNA metabolic process                            | 179  | -0.240148  | -3.7637007 | 0          | 0         | 0          | 9149        | tags=51%, list=28%, signal=71%  |
| GO:0019953 | sexual reproduction                               | 447  | -0.1479521 | -3.7386298 | 0          | 0         | 0          | 9207        | tags=42%, list=28%, signal=58%  |
| GO:0046822 | regulation of nucleocytoplasmic transport         | 156  | -0.253061  | -3.7195182 | 0          | 0         | 0          | 8678        | tags=51%, list=26%, signal=69%  |
| GO:0061024 | membrane organization                             | 354  | -0.1672895 | -3.6894257 | 0          | 0         | 0          | 9057        | tags=44%, list=27%, signal=60%  |
| GO:0001944 | vasculature development                           | 366  | -0.1664309 | -3.6275527 | 0          | 0         | 0          | 9155        | tags=44%, list=28%, signal=60%  |
| GO:1901615 | organic hydroxy compound metabolic process        | 244  | -0.2007189 | -3.62659   | 0          | 0         | 0          | 9184        | tags=48%, list=28%, signal=65%  |
| GO:0007264 | small GTPase mediated signal transduction         | 102  | -0.3139367 | -3.6119018 | 0          | 0         | 0          | 8502        | tags=57%, list=26%, signal=76%  |
| GO:0007389 | pattern specification process                     | 373  | -0.1607804 | -3.5985134 | 0          | 0         | 0          | 8800        | tags=42%, list=26%, signal=57%  |
| GO:0051960 | regulation of nervous system development          | 543  | -0.1272674 | -3.5028615 | 0          | 0         | 0          | 9188        | tags=40%, list=28%, signal=55%  |
| GO:0016485 | protein processing                                | 148  | -0.243022  | -3.4760413 | 0          | 0         | 0          | 8582        | tags=50%, list=26%, signal=67%  |
| GO:0032259 | methylation                                       | 135  | -0.247974  | -3.437004  | 0          | 0         | 0          | 8538        | tags=50%, list=26%, signal=67%  |
| GO:0009172 | nucleoside monophosphate metabolic process        | 221  | -0.1963004 | -3.4164302 | 0          | 0         | 0          | 9165        | tags=47%, list=28%, signal=65%  |
| GO:0044723 | mitotic cell cycle phase transition               | 85   | -0.3172732 | -3.404948  | 0          | 0         | 0          | 9038        | tags=59%, list=27%, signal=81%  |
| GO:0051604 | protein maturation                                | 160  | -0.2291241 | -3.399167  | 0          | 0         | 0          | 8837        | tags=49%, list=27%, signal=67%  |
| GO:0060249 | anatomical structure homeostasis                  | 162  | -0.2291472 | -3.3692312 | 0          | 0         | 0          | 8634        | tags=49%, list=26%, signal=66%  |
| GO:0007163 | establishment or maintenance of cell polarity     | 91   | -0.2992168 | -3.3517835 | 0          | 0         | 0          | 8349        | tags=55%, list=25%, signal=73%  |
| GO:0003002 | regionalization                                   | 272  | -0.1703381 | -3.220084  | 0          | 3.93E-06  | 0.001      | 9420        | tags=45%, list=28%, signal=63%  |
| GO:0048736 | appendage development                             | 144  | -0.2316308 | -3.2036314 | 0          | 3.88E-06  | 0.001      | 9420        | tags=51%, list=28%, signal=71%  |
| GO:0010565 | regulation of cellular ketone metabolic process   | 99   | -0.271486  | -3.17534   | 0          | 3.76E-06  | 0.001      | 8802        | tags=54%, list=26%, signal=73%  |
| GO:0030101 | natural killer cell activation                    | 52   | -0.3578313 | -3.1015046 | 0          | 3.62E-06  | 0.001      | 13060       | tags=75%, list=39%, signal=123% |
| GO:0045862 | positive regulation of proteolysis                | 76   | -0.2914044 | -3.0537364 | 0          | 3.55E-06  | 0.001      | 9147        | tags=57%, list=28%, signal=78%  |
| GO:0023014 | signal transduction by phosphorylation            | 160  | -0.2075955 | -3.049023  | 0          | 3.52E-06  | 0.001      | 7679        | tags=44%, list=23%, signal=57%  |
| GO:0035303 | regulation of dephosphorylation                   | 104  | -0.2437877 | -2.927068  | 0          | 1.01E-05  | 0.003      | 7267        | tags=46%, list=22%, signal=59%  |
| GO:0007626 | locomotory behavior                               | 181  | -0.1841021 | -2.9213166 | 0          | 1.01E-05  | 0.003      | 8977        | tags=45%, list=27%, signal=62%  |
| GO:0031647 | regulation of protein stability                   | 104  | -0.2456094 | -2.8903446 | 0          | 1.32E-05  | 0.004      | 9125        | tags=52%, list=27%, signal=71%  |
| GO:0007224 | smoothened signaling pathway                      | 60   | -0.3212461 | -2.8862612 | 0          | 1.32E-05  | 0.004      | 8181        | tags=57%, list=25%, signal=75%  |
| GO:0043330 | response to exogenous dsRNA                       | 51   | -0.3332731 | -2.780746  | 0          | 3.60E-05  | 0.012      | 13060       | tags=73%, list=39%, signal=119% |
| GO:0008380 | RNA splicing                                      | 85   | -0.2540477 | -2.7517698 | 0          | 4.74E-05  | 0.016      | 9179        | tags=53%, list=28%, signal=73%  |
| GO:0048489 | synaptic vesicle transport                        | 58   | -0.3102233 | -2.745005  | 0          | 4.94E-05  | 0.017      | 9196        | tags=59%, list=28%, signal=81%  |
| GO:0045216 | cell-cell junction organization                   | 90   | -0.2397021 | -2.7281938 | 0          | 5.65E-05  | 0.02       | 8678        | tags=50%, list=26%, signal=67%  |
| GO:0042157 | lipoprotein metabolic process                     | 59   | -0.3015145 | -2.6963456 | 0          | 6.63E-05  | 0.024      | 9155        | tags=58%, list=28%, signal=79%  |
| GO:0030010 | establishment of cell polarity                    | 63   | -0.2891778 | -2.666217  | 0.00194553 | 8.35E-05  | 0.03       | 8349        | tags=54%, list=25%, signal=72%  |



Supplementary Table 7: Gene Set Enrichment Analysis for highly enriched genes in siCon-transfected 3T3-L1 cells at t=48 hr of differentiation

| Term ID    | Description                                                          | SIZE | ES         | NES       | NOM p-val | FDR q-val | FWER p-val | RANK AT MAX | LEADING EDGE                    |
|------------|----------------------------------------------------------------------|------|------------|-----------|-----------|-----------|------------|-------------|---------------------------------|
| GO:0006396 | RNA processing                                                       | 234  | 0.45348072 | 8.155624  | 0         | 0         | 0          | 8615        | tags=71%, list=26%, signal=95%  |
| GO:0044711 | single-organism biosynthetic process                                 | 593  | 0.25341666 | 7.161537  | 0         | 0         | 0          | 8601        | tags=51%, list=26%, signal=67%  |
| GO:0006259 | DNA metabolic process                                                | 401  | 0.29146734 | 6.7521944 | 0         | 0         | 0          | 8667        | tags=55%, list=26%, signal=73%  |
| GO:0007049 | cell cycle                                                           | 528  | 0.24697402 | 6.639975  | 0         | 0         | 0          | 8606        | tags=50%, list=26%, signal=67%  |
| GO:0006082 | organic acid metabolic process                                       | 545  | 0.24974717 | 6.6135774 | 0         | 0         | 0          | 8365        | tags=50%, list=25%, signal=65%  |
| GO:0022402 | cell cycle process                                                   | 507  | 0.24789675 | 6.559803  | 0         | 0         | 0          | 8606        | tags=50%, list=26%, signal=67%  |
| GO:0055086 | nucleobase-containing small molecule metabolic process               | 515  | 0.24806337 | 6.450278  | 0         | 0         | 0          | 8601        | tags=50%, list=26%, signal=67%  |
| GO:0022613 | ribonucleoprotein complex biogenesis                                 | 138  | 0.4674655  | 6.3135686 | 0         | 0         | 0          | 8615        | tags=72%, list=26%, signal=97%  |
| GO:0034660 | ncRNA metabolic process                                              | 129  | 0.47945255 | 6.288133  | 0         | 0         | 0          | 8606        | tags=74%, list=26%, signal=99%  |
| GO:0070271 | protein complex biogenesis                                           | 538  | 0.23394142 | 6.2283325 | 0         | 0         | 0          | 8601        | tags=49%, list=26%, signal=65%  |
| GO:0006412 | translation                                                          | 110  | 0.4955612  | 6.019969  | 0         | 0         | 0          | 10479       | tags=81%, list=32%, signal=118% |
| GO:0034470 | ncRNA processing                                                     | 91   | 0.53382814 | 5.9275823 | 0         | 0         | 0          | 8606        | tags=79%, list=26%, signal=106% |
| GO:0051276 | chromosome organization                                              | 452  | 0.23955186 | 5.8865075 | 0         | 0         | 0          | 8547        | tags=49%, list=26%, signal=66%  |
| GO:0055114 | oxidation-reduction process                                          | 542  | 0.21895446 | 5.822046  | 0         | 0         | 0          | 9463        | tags=50%, list=28%, signal=69%  |
| GO:0034654 | nucleobase-containing compound biosynthetic process                  | 599  | 0.196765   | 5.4992146 | 0         | 0         | 0          | 8951        | tags=46%, list=27%, signal=62%  |
| GO:0016071 | mRNA metabolic process                                               | 179  | 0.340486   | 5.3588963 | 0         | 0         | 0          | 8615        | tags=60%, list=26%, signal=80%  |
| GO:0006281 | DNA repair                                                           | 194  | 0.3359924  | 5.3560553 | 0         | 0         | 0          | 8603        | tags=59%, list=26%, signal=80%  |
| GO:0016482 | cytoplasmic transport                                                | 341  | 0.24457608 | 5.32071   | 0         | 0         | 0          | 8527        | tags=50%, list=26%, signal=66%  |
| GO:0034655 | nucleobase-containing compound catabolic process                     | 430  | 0.22035122 | 5.186867  | 0         | 0         | 0          | 8542        | tags=47%, list=26%, signal=63%  |
| GO:0018193 | peptidyl-amino acid modification                                     | 410  | 0.21663947 | 5.109822  | 0         | 0         | 0          | 8618        | tags=47%, list=26%, signal=63%  |
| GO:0044265 | cellular macromolecule catabolic process                             | 370  | 0.22094665 | 4.9241476 | 0         | 0         | 0          | 8551        | tags=48%, list=26%, signal=63%  |
| GO:0072521 | purine-containing compound metabolic process                         | 345  | 0.22279495 | 4.90054   | 0         | 0         | 0          | 8667        | tags=48%, list=26%, signal=64%  |
| GO:0007059 | chromosome segregation                                               | 107  | 0.39467025 | 4.8922157 | 0         | 0         | 0          | 7739        | tags=63%, list=23%, signal=81%  |
| GO:0009123 | nucleoside monophosphate metabolic process                           | 221  | 0.27911544 | 4.836389  | 0         | 0         | 0          | 8534        | tags=53%, list=26%, signal=71%  |
| GO:0006732 | coenzyme metabolic process                                           | 147  | 0.34142753 | 4.814901  | 0         | 0         | 0          | 8602        | tags=60%, list=26%, signal=80%  |
| GO:0090407 | organophosphate biosynthetic process                                 | 214  | 0.28098145 | 4.785614  | 0         | 0         | 0          | 8585        | tags=54%, list=26%, signal=72%  |
| GO:0009167 | purine ribonucleoside monophosphate metabolic process                | 207  | 0.2764456  | 4.671177  | 0         | 0         | 0          | 8534        | tags=53%, list=26%, signal=71%  |
| GO:1901566 | organonitrogen compound biosynthetic process                         | 290  | 0.22757407 | 4.6622267 | 0         | 0         | 0          | 10041       | tags=53%, list=30%, signal=75%  |
| GO:1901657 | glycosyl compound metabolic process                                  | 56   | 0.52863514 | 4.653685  | 0         | 0         | 0          | 8577        | tags=79%, list=26%, signal=106% |
| GO:0045333 | cellular respiration                                                 | 56   | 0.52863514 | 4.653685  | 0         | 0         | 0          | 8577        | tags=79%, list=26%, signal=106% |
| GO:0032787 | monocarboxylic acid metabolic process                                | 261  | 0.2494226  | 4.645359  | 0         | 0         | 0          | 8260        | tags=50%, list=25%, signal=67%  |
| GO:0051186 | cofactor metabolic process                                           | 184  | 0.29756078 | 4.6320844 | 0         | 0         | 0          | 8431        | tags=54%, list=26%, signal=72%  |
| GO:0010675 | regulation of cellular carbohydrate metabolic process                | 114  | 0.35964808 | 4.5526285 | 0         | 0         | 0          | 8206        | tags=61%, list=25%, signal=80%  |
| GO:0006109 | regulation of carbohydrate metabolic process                         | 119  | 0.3510829  | 4.507318  | 0         | 0         | 0          | 8206        | tags=60%, list=25%, signal=79%  |
| GO:0008380 | RNA splicing                                                         | 85   | 0.41253054 | 4.4456234 | 0         | 0         | 0          | 8615        | tags=67%, list=26%, signal=90%  |
| GO:0010608 | posttranscriptional regulation of gene expression                    | 312  | 0.22042993 | 4.369343  | 0         | 0         | 0          | 8618        | tags=48%, list=26%, signal=64%  |
| GO:0000122 | negative regulation of transcription from RNA polymerase II promoter | 523  | 0.16745126 | 4.3549905 | 0         | 0         | 0          | 8951        | tags=43%, list=27%, signal=58%  |
| GO:1901605 | alpha-amino acid metabolic process                                   | 128  | 0.32277107 | 4.346789  | 0         | 0         | 0          | 7752        | tags=55%, list=23%, signal=72%  |
| GO:0009165 | nucleotide biosynthetic process                                      | 115  | 0.3352763  | 4.281629  | 0         | 0         | 0          | 8551        | tags=59%, list=26%, signal=79%  |
| GO:0006091 | generation of precursor metabolites and energy                       | 132  | 0.32394874 | 4.252611  | 0         | 0         | 0          | 8163        | tags=57%, list=26%, signal=75%  |
| GO:0071103 | DNA conformation change                                              | 91   | 0.37958997 | 4.2215014 | 0         | 0         | 0          | 8605        | tags=64%, list=26%, signal=86%  |
| GO:0019216 | regulation of lipid metabolic process                                | 215  | 0.2460069  | 4.182391  | 0         | 0         | 0          | 8575        | tags=50%, list=26%, signal=67%  |
| GO:0000278 | mitotic cell cycle                                                   | 213  | 0.24448359 | 4.1124587 | 0         | 0         | 0          | 7845        | tags=48%, list=24%, signal=62%  |
| GO:0006417 | regulation of translation                                            | 148  | 0.28977555 | 4.1067066 | 0         | 0         | 0          | 8605        | tags=55%, list=26%, signal=74%  |
| GO:0071826 | ribonucleoprotein complex subunit organization                       | 84   | 0.37278187 | 4.066121  | 0         | 0         | 0          | 8615        | tags=63%, list=26%, signal=85%  |
| GO:0043066 | negative regulation of apoptotic process                             | 529  | 0.15085775 | 4.034474  | 0         | 0         | 0          | 8577        | tags=41%, list=26%, signal=54%  |
| GO:0006260 | DNA replication                                                      | 85   | 0.36565262 | 3.9686887 | 0         | 0         | 0          | 8605        | tags=62%, list=26%, signal=84%  |
| GO:0022618 | ribonucleoprotein complex assembly                                   | 78   | 0.3828114  | 3.967152  | 0         | 0         | 0          | 8615        | tags=64%, list=26%, signal=86%  |
| GO:0043648 | dicarboxylic acid metabolic process                                  | 58   | 0.43171698 | 3.962866  | 0         | 0         | 0          | 8601        | tags=69%, list=26%, signal=93%  |
| GO:0008610 | lipid biosynthetic process                                           | 250  | 0.2142302  | 3.9301527 | 0         | 0         | 0          | 9954        | tags=51%, list=30%, signal=73%  |
| GO:0043467 | regulation of generation of precursor metabolites and energy         | 63   | 0.41324654 | 3.8752625 | 0         | 0         | 0          | 10563       | tags=73%, list=32%, signal=107% |
| GO:0009125 | nucleoside monophosphate catabolic process                           | 173  | 0.25343305 | 3.8738637 | 0         | 0         | 0          | 8530        | tags=51%, list=26%, signal=68%  |
| GO:0009128 | purine nucleoside monophosphate catabolic process                    | 171  | 0.25351968 | 3.7953331 | 0         | 0         | 0          | 8530        | tags=51%, list=26%, signal=68%  |
| GO:1901137 | carbohydrate derivative biosynthetic process                         | 266  | 0.19550423 | 3.77726   | 0         | 0         | 0          | 8551        | tags=45%, list=26%, signal=60%  |
| GO:0007346 | regulation of mitotic cell cycle                                     | 263  | 0.19745618 | 3.728459  | 0         | 0         | 0          | 8910        | tags=46%, list=27%, signal=63%  |
| GO:0006979 | response to oxidative stress                                         | 210  | 0.21380582 | 3.6984947 | 0         | 0         | 0          | 7977        | tags=45%, list=24%, signal=59%  |
| GO:0048878 | chemical homeostasis                                                 | 581  | 0.13481756 | 3.6839356 | 0         | 0         | 0          | 9788        | tags=43%, list=29%, signal=59%  |
| GO:0072522 | purine-containing compound biosynthetic process                      | 81   | 0.34709257 | 3.654688  | 0         | 0         | 0          | 8601        | tags=60%, list=26%, signal=81%  |
| GO:0008283 | cell proliferation                                                   | 433  | 0.14874993 | 3.6115208 | 0         | 0         | 0          | 8633        | tags=41%, list=26%, signal=54%  |
| GO:0051289 | protein homotetramerization                                          | 53   | 0.42122546 | 3.5926993 | 0         | 0         | 0          | 8601        | tags=68%, list=26%, signal=91%  |
| GO:0090305 | nucleic acid phosphodiester bond hydrolysis                          | 111  | 0.28984106 | 3.5713568 | 0         | 0         | 0          | 8667        | tags=55%, list=26%, signal=74%  |
| GO:0050684 | regulation of mRNA processing                                        | 116  | 0.41110593 | 3.5584314 | 0         | 0         | 0          | 8322        | tags=66%, list=25%, signal=88%  |
| GO:0046395 | carboxylic acid catabolic process                                    | 118  | 0.2788492  | 3.5279171 | 0         | 0         | 0          | 8231        | tags=53%, list=25%, signal=70%  |
| GO:0051301 | cell division                                                        | 177  | 0.22356687 | 3.50205   | 0         | 0         | 0          | 8573        | tags=48%, list=26%, signal=64%  |
| GO:0072594 | establishment of protein localization to organelle                   | 138  | 0.25182572 | 3.4979937 | 0         | 0         | 0          | 8527        | tags=51%, list=26%, signal=68%  |
| GO:0040007 | growth                                                               | 311  | 0.17040493 | 3.4962597 | 0         | 0         | 0          | 8606        | tags=43%, list=26%, signal=57%  |
| GO:0061061 | muscle structure development                                         | 339  | 0.1625581  | 3.492189  | 0         | 0         | 0          | 9362        | tags=44%, list=28%, signal=61%  |
| GO:0010565 | regulation of cellular ketone metabolic process                      | 99   | 0.29853508 | 3.4867072 | 0         | 0         | 0          | 8575        | tags=56%, list=26%, signal=75%  |
| GO:0006790 | sulfur compound metabolic process                                    | 136  | 0.24942626 | 3.4664757 | 0         | 0         | 0          | 8365        | tags=50%, list=25%, signal=67%  |
| GO:0030258 | lipid modification                                                   | 97   | 0.29885152 | 3.43641   | 0         | 0         | 0          | 8602        | tags=56%, list=26%, signal=75%  |
| GO:0015931 | nucleobase-containing compound transport                             | 62   | 0.35710326 | 3.3229434 | 0         | 0         | 0          | 8527        | tags=61%, list=26%, signal=82%  |
| GO:0006302 | double-strand break repair                                           | 83   | 0.31116983 | 3.31057   | 0         | 0         | 0          | 7706        | tags=54%, list=23%, signal=70%  |
| GO:0050727 | regulation of inflammatory response                                  | 192  | 0.20188485 | 3.2793875 | 0         | 0         | 0          | 8392        | tags=45%, list=25%, signal=60%  |
| GO:0045444 | fat cell differentiation                                             | 69   | 0.32003817 | 3.2237744 | 0         | 0         | 0          | 1427        | tags=36%, list=4%, signal=38%   |
| GO:0006310 | DNA recombination                                                    | 90   | 0.2875259  | 3.2177663 | 0         | 0         | 0          | 7829        | tags=52%, list=24%, signal=68%  |
| GO:0031331 | positive regulation of cellular catabolic process                    | 109  | 0.25795695 | 3.2112093 | 0         | 0         | 0          | 7923        | tags=50%, list=24%, signal=65%  |
| GO:0046890 | regulation of lipid biosynthetic process                             | 110  | 0.2543825  | 3.1788762 | 0         | 5.22E-06  | 0.001      | 10008       | tags=55%, list=30%, signal=79%  |
| GO:0051050 | positive regulation of transport                                     | 571  | 0.11245929 | 3.1780813 | 0         | 5.19E-06  | 0.001      | 8553        | tags=37%, list=26%, signal=49%  |
| GO:0032259 | methylation                                                          | 135  | 0.23327997 | 3.1504214 | 0         | 5.12E-06  | 0.001      | 8530        | tags=49%, list=26%, signal=65%  |
| GO:0017038 | protein import                                                       | 97   | 0.2700953  | 3.1372437 | 0         | 4.99E-06  | 0.001      | 8527        | tags=53%, list=26%, signal=71%  |
| GO:0006575 | cellular modified amino acid metabolic process                       | 123  | 0.24457459 | 3.1208131 | 0         | 4.96E-06  | 0.001      | 8928        | tags=51%, list=27%, signal=70%  |
| GO:0044723 | single-organism carbohydrate metabolic process                       | 279  | 0.15623568 | 3.107897  | 0         | 4.90E-06  | 0.001      | 7600        | tags=38%, list=23%, signal=49%  |
| GO:0007126 | meiosis                                                              | 96   | 0.2688616  | 3.0972157 | 0         | 4.87E-06  | 0.001      | 8057        | tags=51%, list=24%, signal=67%  |
| GO:0006839 | mitochondrial transport                                              | 74   | 0.29804105 | 3.0800412 | 0         | 4.79E-06  | 0.001      | 8534        | tags=55%, list=26%, signal=74%  |
| GO:0051640 | organelle localization                                               | 201  | 0.18706006 | 3.0700545 | 0         | 4.76E-06  | 0.001      | 8540        | tags=44%, list=26%, signal=59%  |
| GO:0006261 | DNA-dependent DNA replication                                        | 51   | 0.36920577 | 3.0610275 | 0         | 4.73E-06  | 0.001      | 8605        | tags=63%, list=26%, signal=85%  |
| GO:0071824 | protein-DNA complex subunit organization                             | 51   | 0.36908528 | 3.0522757 | 0         | 4.68E-06  | 0.001      | 8609        | tags=63%, list=26%, signal=85%  |
| GO:0032844 | regulation of homeostatic process                                    | 282  | 0.15523265 | 2.9721014 | 0         | 4.60E-06  | 0.001      | 10092       | tags=46%, list=30%, signal=65%  |
| GO:0031396 | regulation of protein ubiquitination                                 | 113  | 0.23220588 | 2.9472594 | 0         | 4.57E-06  | 0.001      | 7900        | tags=47%, list=24%, signal=61%  |
| GO:0050865 | regulation of cell activation                                        | 335  | 0.13906783 | 2.932502  | 0         | 1.34E-05  | 0.003      | 10211       | tags=44%, list=31%, signal=64%  |

|            |                                                         |     |            |           |          |          |       |       |                                 |
|------------|---------------------------------------------------------|-----|------------|-----------|----------|----------|-------|-------|---------------------------------|
| GO:0070646 | protein modification by small protein removal           | 75  | 0.28339273 | 2.9289825 | 0        | 1.77E-05 | 0.004 | 9218  | tags=56%, list=28%, signal=77%  |
| GO:0051321 | meiotic cell cycle                                      | 101 | 0.24785416 | 2.9274647 | 0        | 1.76E-05 | 0.004 | 8573  | tags=50%, list=26%, signal=68%  |
| GO:0006323 | DNA packaging                                           | 54  | 0.3365832  | 2.9004579 | 0        | 2.59E-05 | 0.006 | 8530  | tags=59%, list=26%, signal=80%  |
| GO:0043414 | macromolecule methylation                               | 117 | 0.23143785 | 2.886418  | 0        | 2.58E-05 | 0.006 | 8530  | tags=49%, list=26%, signal=65%  |
| GO:0010498 | proteasomal protein catabolic process                   | 110 | 0.23338087 | 2.8803222 | 0        | 3.81E-05 | 0.009 | 8588  | tags=49%, list=26%, signal=66%  |
| GO:0051302 | regulation of cell division                             | 115 | 0.22380655 | 2.871471  | 0        | 3.77E-05 | 0.009 | 8775  | tags=49%, list=26%, signal=66%  |
| GO:0006275 | regulation of DNA replication                           | 92  | 0.25450647 | 2.863415  | 0        | 3.75E-05 | 0.009 | 8547  | tags=51%, list=26%, signal=69%  |
| GO:0071478 | cellular response to radiation                          | 79  | 0.27556917 | 2.861568  | 0        | 3.73E-05 | 0.009 | 7694  | tags=51%, list=23%, signal=66%  |
| GO:0009725 | response to hormone stimulus                            | 363 | 0.13235202 | 2.846107  | 0        | 3.70E-05 | 0.009 | 10211 | tags=44%, list=21%, signal=63%  |
| GO:0001824 | blastocyst development                                  | 72  | 0.28723127 | 2.843375  | 0        | 3.68E-05 | 0.009 | 8942  | tags=56%, list=27%, signal=76%  |
| GO:0071805 | potassium ion transmembrane transport                   | 121 | 0.22129007 | 2.8198617 | 0        | 3.64E-05 | 0.009 | 19324 | tags=80%, list=58%, signal=191% |
| GO:0007517 | muscle organ development                                | 194 | 0.17131089 | 2.8195271 | 0        | 3.62E-05 | 0.009 | 10619 | tags=49%, list=32%, signal=72%  |
| GO:0015850 | organic hydroxy compound transport                      | 74  | 0.27273202 | 2.8060503 | 0        | 3.98E-05 | 0.01  | 8475  | tags=53%, list=25%, signal=71%  |
| GO:0030198 | extracellular matrix organization                       | 143 | 0.19884458 | 2.763261  | 0        | 5.94E-05 | 0.015 | 8530  | tags=45%, list=26%, signal=61%  |
| GO:0048610 | cellular process involved in reproduction               | 337 | 0.1302919  | 2.755669  | 0        | 7.08E-05 | 0.018 | 9623  | tags=42%, list=29%, signal=58%  |
| GO:0071705 | nitrogen compound transport                             | 272 | 0.14023651 | 2.7311828 | 0        | 8.10E-05 | 0.021 | 8577  | tags=40%, list=26%, signal=53%  |
| GO:0043062 | extracellular structure organization                    | 144 | 0.19568029 | 2.7120702 | 0        | 8.71E-05 | 0.023 | 8530  | tags=45%, list=26%, signal=60%  |
| GO:0006813 | potassium ion transport                                 | 132 | 0.19992867 | 2.7055109 | 0        | 9.42E-05 | 0.025 | 19324 | tags=78%, list=58%, signal=186% |
| GO:0043484 | regulation of RNA splicing                              | 59  | 0.2925913  | 2.7033465 | 0        | 9.75E-05 | 0.026 | 8322  | tags=54%, list=25%, signal=72%  |
| GO:0034599 | cellular response to oxidative stress                   | 112 | 0.21821173 | 2.7014441 | 0        | 9.71E-05 | 0.026 | 7909  | tags=46%, list=24%, signal=60%  |
| GO:0052547 | regulation of peptidase activity                        | 272 | 0.13863705 | 2.6739967 | 0        | 1.30E-04 | 0.035 | 6796  | tags=34%, list=20%, signal=43%  |
| GO:0042593 | glucose homeostasis                                     | 121 | 0.2034039  | 2.667982  | 0        | 1.41E-04 | 0.038 | 9199  | tags=48%, list=28%, signal=66%  |
| GO:1901698 | response to nitrogen compound                           | 501 | 0.10092685 | 2.6494074 | 0        | 1.46E-04 | 0.04  | 8574  | tags=36%, list=26%, signal=47%  |
| GO:0055088 | lipid homeostasis                                       | 77  | 0.254814   | 2.6454492 | 0        | 1.55E-04 | 0.042 | 9683  | tags=55%, list=29%, signal=77%  |
| GO:0014706 | striated muscle tissue development                      | 240 | 0.14914125 | 2.624339  | 0        | 1.91E-04 | 0.051 | 8792  | tags=41%, list=26%, signal=56%  |
| GO:0021782 | glial cell development                                  | 59  | 0.29089195 | 2.6229906 | 0        | 1.90E-04 | 0.051 | 8942  | tags=56%, list=27%, signal=76%  |
| GO:0001890 | placenta development                                    | 134 | 0.19077103 | 2.6223893 | 0        | 1.89E-04 | 0.051 | 8570  | tags=45%, list=26%, signal=60%  |
| GO:0051241 | negative regulation of multicellular organismal process | 318 | 0.12669249 | 2.6156278 | 0        | 2.06E-04 | 0.056 | 8479  | tags=38%, list=25%, signal=51%  |
| GO:0048871 | multicellular organismal homeostasis                    | 159 | 0.17659664 | 2.614055  | 0        | 2.05E-04 | 0.056 | 8585  | tags=43%, list=26%, signal=58%  |
| GO:0033500 | carbohydrate homeostasis                                | 121 | 0.2034039  | 2.610297  | 0        | 2.15E-04 | 0.059 | 9199  | tags=48%, list=28%, signal=66%  |
| GO:0050878 | regulation of body fluid levels                         | 161 | 0.17227031 | 2.5730689 | 0        | 2.63E-04 | 0.074 | 9995  | tags=47%, list=30%, signal=67%  |
| GO:0044262 | cellular carbohydrate metabolic process                 | 84  | 0.23767315 | 2.532458  | 0        | 3.55E-04 | 0.101 | 8346  | tags=49%, list=25%, signal=65%  |
| GO:0061136 | regulation of proteasomal protein catabolic process     | 81  | 0.23715718 | 2.529238  | 0        | 3.60E-04 | 0.103 | 8553  | tags=49%, list=26%, signal=66%  |
| GO:0061458 | reproductive system development                         | 223 | 0.1438763  | 2.5220964 | 0        | 3.79E-04 | 0.108 | 8667  | tags=40%, list=26%, signal=54%  |
| GO:0048520 | positive regulation of behavior                         | 101 | 0.2162302  | 2.5184104 | 0        | 3.87E-04 | 0.11  | 7646  | tags=45%, list=23%, signal=58%  |
| GO:0044242 | cellular lipid catabolic process                        | 97  | 0.22352554 | 2.5120099 | 0        | 3.99E-04 | 0.114 | 8357  | tags=47%, list=25%, signal=63%  |
| GO:0071214 | cellular response to abiotic stimulus                   | 131 | 0.1853334  | 2.5080063 | 0        | 4.07E-04 | 0.117 | 8329  | tags=44%, list=25%, signal=58%  |
| GO:0016042 | lipid catabolic process                                 | 117 | 0.20235017 | 2.5050256 | 0        | 4.12E-04 | 0.119 | 8357  | tags=45%, list=25%, signal=60%  |
| GO:0006066 | alcohol metabolic process                               | 164 | 0.16332719 | 2.4501996 | 0        | 6.05E-04 | 0.179 | 8585  | tags=42%, list=26%, signal=56%  |
| GO:0006639 | acylglycerol metabolic process                          | 57  | 0.27350664 | 2.442612  | 0        | 6.11E-04 | 0.183 | 8421  | tags=53%, list=25%, signal=70%  |
| GO:0003018 | vascular process in circulatory system                  | 77  | 0.23805712 | 2.438942  | 0        | 6.37E-04 | 0.19  | 7216  | tags=45%, list=22%, signal=58%  |
| GO:0048872 | homeostasis of number of cells                          | 169 | 0.1612845  | 2.4382162 | 0        | 6.38E-04 | 0.19  | 8633  | tags=42%, list=26%, signal=56%  |
| GO:0016050 | vesicle organization                                    | 88  | 0.22332267 | 2.4247236 | 0        | 7.01E-04 | 0.21  | 8463  | tags=48%, list=25%, signal=64%  |
| GO:0045637 | regulation of myeloid cell differentiation              | 139 | 0.17408213 | 2.4218872 | 0        | 6.99E-04 | 0.211 | 8588  | tags=43%, list=26%, signal=58%  |
| GO:0006006 | glucose metabolic process                               | 75  | 0.23719203 | 2.414232  | 0        | 7.23E-04 | 0.218 | 8534  | tags=49%, list=26%, signal=66%  |
| GO:0007548 | sex differentiation                                     | 204 | 0.1470891  | 2.412705  | 0        | 7.24E-04 | 0.219 | 8667  | tags=41%, list=26%, signal=55%  |
| GO:0007610 | behavior                                                | 462 | 0.09530542 | 2.3805897 | 0        | 8.61E-04 | 0.257 | 10549 | tags=41%, list=32%, signal=59%  |
| GO:0051604 | protein maturation                                      | 160 | 0.16269946 | 2.3752468 | 0        | 8.93E-04 | 0.267 | 9994  | tags=46%, list=30%, signal=66%  |
| GO:0044744 | protein targeting to nucleus                            | 74  | 0.23053376 | 2.3656347 | 0.002079 | 9.59E-04 | 0.286 | 8527  | tags=49%, list=26%, signal=65%  |

Supplementary Table 8: Gene Set Enrichment Analysis for highly enriched genes in si14-3-3 $\zeta$ -transfected 3T3-L1 cells at t=48 hr of differentiation

| Term ID    | Description                                      | SIZE | ES         | NES        | NOM p-val | FDR q-val | FWER p-val | RANK AT MAX | LEADING EDGE                    |
|------------|--------------------------------------------------|------|------------|------------|-----------|-----------|------------|-------------|---------------------------------|
| GO:0016192 | vesicle-mediated transport                       | 489  | -0.2361505 | -6.80085   | 0         | 0         | 0          | 8720        | tags=49%, list=26%, signal=66%  |
| GO:0051338 | regulation of transferase activity               | 502  | -0.2227057 | -5.769673  | 0         | 0         | 0          | 8671        | tags=48%, list=26%, signal=64%  |
| GO:0030029 | actin filament-based process                     | 273  | -0.2970658 | -5.734875  | 0         | 0         | 0          | 8718        | tags=56%, list=26%, signal=75%  |
| GO:0051726 | regulation of cell cycle                         | 523  | -0.2115478 | -5.602441  | 0         | 0         | 0          | 8663        | tags=47%, list=26%, signal=62%  |
| GO:0040012 | regulation of locomotion                         | 497  | -0.2185218 | -5.5083847 | 0         | 0         | 0          | 8633        | tags=47%, list=26%, signal=63%  |
| GO:0044087 | regulation of cellular component biogenesis      | 355  | -0.231789  | -5.1717477 | 0         | 0         | 0          | 8674        | tags=49%, list=26%, signal=66%  |
| GO:0009118 | regulation of nucleoside metabolic process       | 322  | -0.2468043 | -5.038128  | 0         | 0         | 0          | 8603        | tags=50%, list=26%, signal=67%  |
| GO:0016265 | death                                            | 558  | -0.1833818 | -4.9549775 | 0         | 0         | 0          | 8665        | tags=44%, list=26%, signal=59%  |
| GO:0043009 | chordate embryonic development                   | 565  | -0.1818715 | -4.8722143 | 0         | 0         | 0          | 8946        | tags=45%, list=27%, signal=60%  |
| GO:0051674 | localization of cell                             | 578  | -0.1724396 | -4.7479477 | 0         | 0         | 0          | 8634        | tags=43%, list=26%, signal=57%  |
| GO:0044782 | cilium organization                              | 118  | -0.3615969 | -4.6650243 | 0         | 0         | 0          | 8591        | tags=62%, list=26%, signal=83%  |
| GO:0035295 | tube development                                 | 417  | -0.1997826 | -4.6648045 | 0         | 0         | 0          | 7954        | tags=44%, list=24%, signal=57%  |
| GO:0001934 | positive regulation of protein phosphorylation   | 497  | -0.18468   | -4.659271  | 0         | 0         | 0          | 8671        | tags=44%, list=26%, signal=59%  |
| GO:0051960 | regulation of nervous system development         | 543  | -0.1740141 | -4.6578426 | 0         | 0         | 0          | 8700        | tags=43%, list=26%, signal=58%  |
| GO:0022610 | biological adhesion                              | 360  | -0.2121174 | -4.626606  | 0         | 0         | 0          | 8634        | tags=47%, list=26%, signal=63%  |
| GO:0061024 | membrane organization                            | 354  | -0.2132091 | -4.554719  | 0         | 0         | 0          | 8016        | tags=45%, list=24%, signal=59%  |
| GO:0006508 | proteolysis                                      | 341  | -0.2123188 | -4.5170197 | 0         | 0         | 0          | 8713        | tags=47%, list=26%, signal=63%  |
| GO:0001501 | skeletal system development                      | 338  | -0.2123708 | -4.515681  | 0         | 0         | 0          | 8850        | tags=48%, list=27%, signal=64%  |
| GO:0007551 | cell adhesion                                    | 353  | -0.2043017 | -4.414575  | 0         | 0         | 0          | 8634        | tags=46%, list=26%, signal=62%  |
| GO:0007017 | microtubule-based process                        | 310  | -0.2080735 | -4.350895  | 0         | 0         | 0          | 8700        | tags=47%, list=26%, signal=63%  |
| GO:0040008 | regulation of growth                             | 461  | -0.1722964 | -4.171805  | 0         | 0         | 0          | 8633        | tags=43%, list=26%, signal=57%  |
| GO:0007167 | enzyme linked receptor protein signaling pathway | 372  | -0.1899223 | -4.163828  | 0         | 0         | 0          | 8684        | tags=45%, list=26%, signal=60%  |
| GO:0016197 | endosomal transport                              | 101  | -0.3430935 | -4.123549  | 0         | 0         | 0          | 8710        | tags=60%, list=26%, signal=82%  |
| GO:0060627 | regulation of vesicle-mediated transport         | 247  | -0.2212148 | -4.033931  | 0         | 0         | 0          | 8720        | tags=48%, list=26%, signal=65%  |
| GO:0051052 | regulation of DNA metabolic process              | 226  | -0.2233231 | -4.0264244 | 0         | 0         | 0          | 8663        | tags=48%, list=26%, signal=65%  |
| GO:0043069 | negative regulation of programmed cell death     | 540  | -0.1510924 | -3.964681  | 0         | 0         | 0          | 8544        | tags=41%, list=26%, signal=54%  |
| GO:0007018 | microtubule-based movement                       | 106  | -0.3364804 | -3.9404993 | 0         | 0         | 0          | 8611        | tags=59%, list=26%, signal=80%  |
| GO:0007033 | vacuole organization                             | 51   | -0.4419144 | -3.7341652 | 0         | 0         | 0          | 8149        | tags=69%, list=25%, signal=91%  |
| GO:0001822 | kidney development                               | 154  | -0.2531526 | -3.7174761 | 0         | 0         | 0          | 8680        | tags=51%, list=26%, signal=69%  |
| GO:0009607 | response to biotic stimulus                      | 419  | -0.1559732 | -3.7136965 | 0         | 0         | 0          | 8768        | tags=42%, list=26%, signal=56%  |
| GO:0001655 | urogenital system development                    | 222  | -0.2193321 | -3.6954725 | 0         | 0         | 0          | 6237        | tags=41%, list=19%, signal=50%  |
| GO:0006914 | autophagy                                        | 50   | -0.4356172 | -3.6658747 | 0         | 0         | 0          | 8149        | tags=68%, list=25%, signal=90%  |
| GO:0007389 | pattern specification process                    | 373  | -0.1595423 | -3.6485147 | 0         | 0         | 0          | 9019        | tags=43%, list=27%, signal=58%  |
| GO:0043207 | response to external biotic stimulus             | 407  | -0.1559459 | -3.641813  | 0         | 0         | 0          | 8768        | tags=42%, list=26%, signal=56%  |
| GO:0048736 | appendage development                            | 144  | -0.2459476 | -3.5145888 | 0         | 0         | 0          | 8946        | tags=51%, list=27%, signal=70%  |
| GO:0034330 | cell junction organization                       | 99   | -0.2973587 | -3.4823043 | 0         | 0         | 0          | 8616        | tags=56%, list=26%, signal=75%  |
| GO:0090066 | regulation of anatomical structure size          | 220  | -0.1897631 | -3.3558002 | 0         | 0         | 0          | 8545        | tags=45%, list=26%, signal=60%  |
| GO:0019953 | sexual reproduction                              | 447  | -0.1385429 | -3.3028207 | 0         | 0         | 0          | 8623        | tags=40%, list=26%, signal=53%  |
| GO:0003002 | regionalization                                  | 272  | -0.1743102 | -3.2917876 | 0         | 0         | 0          | 9289        | tags=45%, list=28%, signal=62%  |
| GO:0005975 | carbohydrate metabolic process                   | 291  | -0.1645853 | -3.2805629 | 0         | 0         | 0          | 8174        | tags=41%, list=25%, signal=54%  |
| GO:0006650 | glycerophospholipid metabolic process            | 124  | -0.2504226 | -3.271072  | 0         | 0         | 0          | 8331        | tags=50%, list=25%, signal=66%  |
| GO:0032970 | regulation of actin filament-based process       | 199  | -0.1993976 | -3.2358994 | 0         | 0         | 0          | 8616        | tags=46%, list=26%, signal=61%  |
| GO:0030855 | epithelial cell differentiation                  | 347  | -0.1482942 | -3.1943257 | 0         | 0         | 0          | 8633        | tags=41%, list=26%, signal=54%  |
| GO:0009611 | response to wounding                             | 353  | -0.1447205 | -3.1915536 | 0         | 0         | 0          | 8616        | tags=40%, list=26%, signal=54%  |
| GO:0006366 | transcription from RNA polymerase II promoter    | 381  | -0.1405681 | -3.1911757 | 0         | 0         | 0          | 8559        | tags=40%, list=26%, signal=53%  |
| GO:0050776 | regulation of immune response                    | 342  | -0.1444324 | -3.116725  | 0         | 0         | 0          | 8766        | tags=41%, list=26%, signal=55%  |
| GO:0007224 | smoothed signaling pathway                       | 60   | -0.3347433 | -3.0625434 | 0         | 0         | 0          | 7733        | tags=57%, list=23%, signal=74%  |
| GO:0001503 | ossification                                     | 142  | -0.2161579 | -3.0522537 | 0         | 0         | 0          | 8065        | tags=46%, list=24%, signal=60%  |
| GO:0071396 | cellular response to lipid                       | 195  | -0.1862987 | -3.0480232 | 0         | 0         | 0          | 15840       | tags=66%, list=48%, signal=126% |
| GO:0050678 | regulation of epithelial cell proliferation      | 221  | -0.1739182 | -3.0351386 | 0         | 0         | 0          | 9152        | tags=45%, list=28%, signal=61%  |
| GO:0009636 | response to toxic substance                      | 79   | -0.2923874 | -3.0161343 | 0         | 3.69E-06  | 0.001      | 7559        | tags=52%, list=23%, signal=67%  |
| GO:0071495 | cellular response to endogenous stimulus         | 510  | -0.1144523 | -2.990661  | 0         | 3.63E-06  | 0.001      | 8446        | tags=37%, list=25%, signal=48%  |
| GO:0000910 | cytokinesis                                      | 62   | -0.3168415 | -2.9571779 | 0         | 7.00E-06  | 0.002      | 7720        | tags=55%, list=23%, signal=71%  |

Supplementary Table 9: RNA-Seq analysis of significantly changed genes between WT and 14-3-3(KO WAT

|    | Gene Name              | WT       | KO       | log2_fold_change | test_stat | p_value | q_value   | significant |
|----|------------------------|----------|----------|------------------|-----------|---------|-----------|-------------|
| 1  | Gsta3                  | 60.1482  | 220.266  | 1.87266          | 1.6886    | 0.00005 | 0.0168529 | yes         |
| 2  | Cd84                   | 74.7583  | 10.8118  | -2.78962         | -1.87853  | 0.00005 | 0.0168529 | yes         |
| 3  | Zranb3                 | 11.7006  | 1.76169  | -2.73155         | -1.57406  | 0.0001  | 0.0291356 | yes         |
| 4  | Ptprc                  | 28.3934  | 7.61966  | -1.89776         | -1.62167  | 0.0001  | 0.0291356 | yes         |
| 5  | Soat1                  | 18.3116  | 4.54622  | -2.01002         | -1.80544  | 0.0001  | 0.0291356 | yes         |
| 6  | Fcgr3                  | 132.566  | 31.2613  | -2.08426         | -1.88792  | 0.00005 | 0.0168529 | yes         |
| 7  | Itgb2                  | 95.1603  | 15.2225  | -2.64415         | -2.00548  | 0.0002  | 0.0419268 | yes         |
| 8  | Lum                    | 63.7533  | 16.9959  | -1.90731         | -1.86223  | 0.00015 | 0.0353219 | yes         |
| 9  | Gas2l3                 | 3.6384   | 0.445201 | -3.03077         | -1.81063  | 0.00015 | 0.0353219 | yes         |
| 10 | Col1a1                 | 60.0326  | 10.2653  | -2.54797         | -2.12031  | 0.00005 | 0.0168529 | yes         |
| 11 | Cd68                   | 272.485  | 42.7278  | -2.67293         | -2.11219  | 0.00005 | 0.0168529 | yes         |
| 12 | Slc4a1                 | 0.227586 | 4.39131  | 4.27017          | 1.19142   | 0.00005 | 0.0168529 | yes         |
| 13 | Cd300lb                | 29.8549  | 2.86461  | -3.38155         | -2.19327  | 0.00005 | 0.0168529 | yes         |
| 14 | Cd300ld                | 26.497   | 4.22587  | -2.64851         | -2.18922  | 0.00005 | 0.0168529 | yes         |
| 15 | AF251705,Gm11709       | 43.3304  | 5.98087  | -2.85695         | -2.30166  | 0.00005 | 0.0168529 | yes         |
| 16 | Ahnak2                 | 10.419   | 1.73855  | -2.58326         | -1.99768  | 0.00005 | 0.0168529 | yes         |
| 17 | Ighg3                  | 3.12384  | 77.7305  | 4.63709          | 2.71027   | 0.00005 | 0.0168529 | yes         |
| 18 | Gadd45g                | 23.729   | 115.464  | 2.28271          | 1.86996   | 0.0002  | 0.0419268 | yes         |
| 19 | Sema4d                 | 8.40211  | 1.97682  | -2.08757         | -1.48663  | 0.00005 | 0.0168529 | yes         |
| 20 | Cma1                   | 38.7107  | 5.70688  | -2.76196         | -2.03026  | 0.00015 | 0.0353219 | yes         |
| 21 | Ywhaz                  | 107.232  | 22.5113  | -2.25201         | -2.05306  | 0.0002  | 0.0419268 | yes         |
| 22 | Nfam1                  | 16.9394  | 2.69452  | -2.65229         | -1.88883  | 0.00015 | 0.0353219 | yes         |
| 23 | Cd200r1                | 15.3232  | 1.69513  | -3.17625         | -1.8142   | 0.0002  | 0.0419268 | yes         |
| 24 | Tpsb2                  | 33.404   | 4.79389  | -2.80075         | -1.75352  | 0.0002  | 0.0419268 | yes         |
| 25 | Myo1f                  | 35.8196  | 3.74727  | -3.25684         | -2.02719  | 0.00015 | 0.0353219 | yes         |
| 26 | Ier3                   | 17.0311  | 84.8353  | 2.31649          | 2.23432   | 0.00005 | 0.0168529 | yes         |
| 27 | Trem2                  | 182.24   | 15.2947  | -3.57474         | -2.58457  | 0.00005 | 0.0168529 | yes         |
| 28 | Emr1                   | 95.5065  | 7.78994  | -3.61592         | -2.65646  | 0.00005 | 0.0168529 | yes         |
| 29 | Mpeg1                  | 142.319  | 17.8949  | -2.99151         | -2.13241  | 0.00005 | 0.0168529 | yes         |
| 30 | Dock8                  | 15.2778  | 4.58114  | -1.73766         | -1.57149  | 0.00025 | 0.0499709 | yes         |
| 31 | Ms4a7                  | 63.9103  | 7.61632  | -3.06888         | -2.10948  | 0.00005 | 0.0168529 | yes         |
| 32 | Lipa                   | 158.049  | 25.7894  | -2.61552         | -2.0193   | 0.0002  | 0.0419268 | yes         |
| 33 | Pik3ap1                | 16.4405  | 2.40731  | -2.77176         | -2.20135  | 0.00005 | 0.0168529 | yes         |
| 34 | Arhgap19               | 12.3071  | 2.11964  | -2.5376          | -1.70941  | 0.00015 | 0.0353219 | yes         |
| 35 | Ili1r1                 | 16.0331  | 1.63234  | -3.29604         | -1.63609  | 0.00015 | 0.0353219 | yes         |
| 36 | AA467197,Mir147        | 3.02019  | 31.8232  | 3.39737          | 1.62029   | 0.00005 | 0.0168529 | yes         |
| 37 | SNORA71,Snhg11         | 10.8806  | 45.5648  | 2.06616          | 1.75754   | 0.00005 | 0.0168529 | yes         |
| 38 | Cd44                   | 36.8633  | 9.7028   | -1.92571         | -1.64932  | 0.00015 | 0.0353219 | yes         |
| 39 | Atp8b4                 | 4.09551  | 0.588127 | -2.79984         | -1.71761  | 0.00005 | 0.0168529 | yes         |
| 40 | Siglec1                | 7.49662  | 1.57024  | -2.25256         | -1.80861  | 0.0002  | 0.0419268 | yes         |
| 41 | Mafb                   | 48.1098  | 11.886   | -2.01707         | -1.88804  | 0.00015 | 0.0353219 | yes         |
| 42 | Nceh1                  | 23.0693  | 4.18831  | -2.46153         | -2.04581  | 0.00005 | 0.0168529 | yes         |
| 43 | Ctsk                   | 111.615  | 19.9449  | -2.48444         | -2.25629  | 0.00005 | 0.0168529 | yes         |
| 44 | Ctss                   | 572.263  | 86.434   | -2.72701         | -2.16688  | 0.0001  | 0.0291356 | yes         |
| 45 | Sdc3                   | 39.9913  | 10.4489  | -1.93633         | -1.76606  | 0.0002  | 0.0419268 | yes         |
| 46 | Ptafr                  | 24.3889  | 2.79531  | -3.12514         | -2.57622  | 0.00005 | 0.0168529 | yes         |
| 47 | Atp6v0d2               | 93.7766  | 12.4209  | -2.91646         | -2.34642  | 0.00005 | 0.0168529 | yes         |
| 48 | C1qb                   | 359.144  | 92.2969  | -2.32921         | -1.5227   | 0.0002  | 0.0419268 | yes         |
| 49 | Acacb                  | 6.93223  | 59.5802  | 3.10344          | 1.94199   | 0.00005 | 0.0168529 | yes         |
| 50 | Daglb                  | 27.7535  | 6.65146  | -2.06093         | -1.72523  | 0.00005 | 0.0168529 | yes         |
| 51 | Capg                   | 264.099  | 62.2081  | -2.0859          | -1.85883  | 0.0001  | 0.0291356 | yes         |
| 52 | Clec4a3                | 29.5356  | 2.82491  | -3.38618         | -2.07489  | 0.00005 | 0.0168529 | yes         |
| 53 | Clec4a2                | 46.0799  | 6.71327  | -2.77905         | -1.87882  | 0.00005 | 0.0168529 | yes         |
| 54 | C530028O21Rik          | 11.8474  | 1.58346  | -2.90343         | -1.76085  | 0.00005 | 0.0168529 | yes         |
| 55 | Clec12a                | 49.7811  | 4.11072  | -3.59813         | -2.54298  | 0.00005 | 0.0168529 | yes         |
| 56 | Apold1                 | 4.06442  | 25.3431  | 2.64047          | 1.74406   | 0.00005 | 0.0168529 | yes         |
| 57 | Arhgap25               | 35.7297  | 6.05842  | -2.56011         | -1.94177  | 0.00005 | 0.0168529 | yes         |
| 58 | Apobec1                | 76.816   | 14.1357  | -2.44206         | -1.80742  | 0.00015 | 0.0353219 | yes         |
| 59 | C3ar1                  | 38.1332  | 5.25539  | -2.85918         | -2.4003   | 0.00005 | 0.0168529 | yes         |
| 60 | Clec7a                 | 49.6681  | 8.5276   | -2.54211         | -1.92213  | 0.0001  | 0.0291356 | yes         |
| 61 | Z310014L17Rik,U6       | 0.488944 | 139.327  | 8.15459          | 3.07234   | 0.00005 | 0.0168529 | yes         |
| 62 | Cyp2f2                 | 2.08     | 45.5433  | 4.45258          | 3.14411   | 0.00005 | 0.0168529 | yes         |
| 63 | Tyrobp                 | 469.755  | 71.8516  | -2.70881         | -3.21639  | 0.00005 | 0.0168529 | yes         |
| 64 | Itgax                  | 49.0664  | 5.98807  | -3.03457         | -1.99853  | 0.00005 | 0.0168529 | yes         |
| 65 | Gm14548,Gm15922,Lilrb3 | 33.718   | 6.97633  | -2.27298         | -1.707    | 0.00005 | 0.0168529 | yes         |
| 66 | Lair1                  | 15.3399  | 1.4875   | -3.36634         | -1.51053  | 0.00015 | 0.0353219 | yes         |
| 67 | Atp1a3                 | 17.409   | 2.63824  | -2.72219         | -1.74069  | 0.00005 | 0.0168529 | yes         |
| 68 | Anpep                  | 55.4056  | 7.40268  | -2.90391         | -2.32152  | 0.00005 | 0.0168529 | yes         |
| 69 | Adam8                  | 64.7107  | 8.51135  | -2.92654         | -1.61393  | 0.00005 | 0.0168529 | yes         |
| 70 | Msr1                   | 22.8286  | 3.10179  | -2.87967         | -1.7845   | 0.00005 | 0.0168529 | yes         |
| 71 | Ces1f                  | 26.447   | 131.871  | 2.31795          | 1.99936   | 0.00005 | 0.0168529 | yes         |
| 72 | Cott1                  | 131.618  | 30.6453  | -2.10261         | -1.86318  | 0.00015 | 0.0353219 | yes         |
| 73 | Mmp7                   | 15.744   | 126.278  | 3.00373          | 2.05297   | 0.00025 | 0.0499709 | yes         |
| 74 | S1pr2                  | 10.712   | 1.55295  | -2.78615         | -2.00295  | 0.00025 | 0.0499709 | yes         |
| 75 | Slc37a2                | 30.1536  | 2.13361  | -3.82096         | -2.4929   | 0.00005 | 0.0168529 | yes         |
| 76 | Tlr13                  | 16.2404  | 2.4535   | -2.72668         | -1.98869  | 0.00005 | 0.0168529 | yes         |
| 77 | Cybb                   | 36.7509  | 5.6771   | -2.69455         | -2.24621  | 0.00005 | 0.0168529 | yes         |
| 78 | Tlr8                   | 13.2891  | 1.06259  | -3.64458         | -2.28404  | 0.00005 | 0.0168529 | yes         |
